# Supplementary material for: CDetection: CRISPR-Cas12b-based DNA detection with sub-attomolar sensitivity and single-base specificity
Source: PubMed Central journal article supplement (PMC6604390; doi:10.1186/s13059-019-1742-z), 2019-07-01
Supplement: 13059_2019_1742_MOESM1_ESM.pdf [file 13059_2019_1742_MOESM1_ESM.pdf]

# Figure S1

**a**

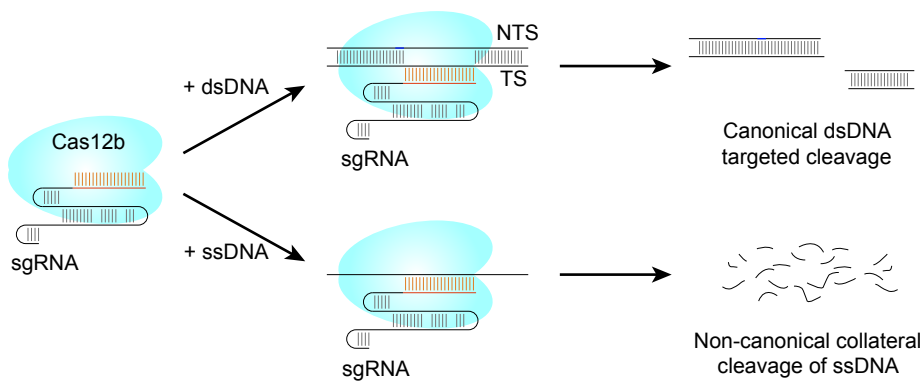

**b**

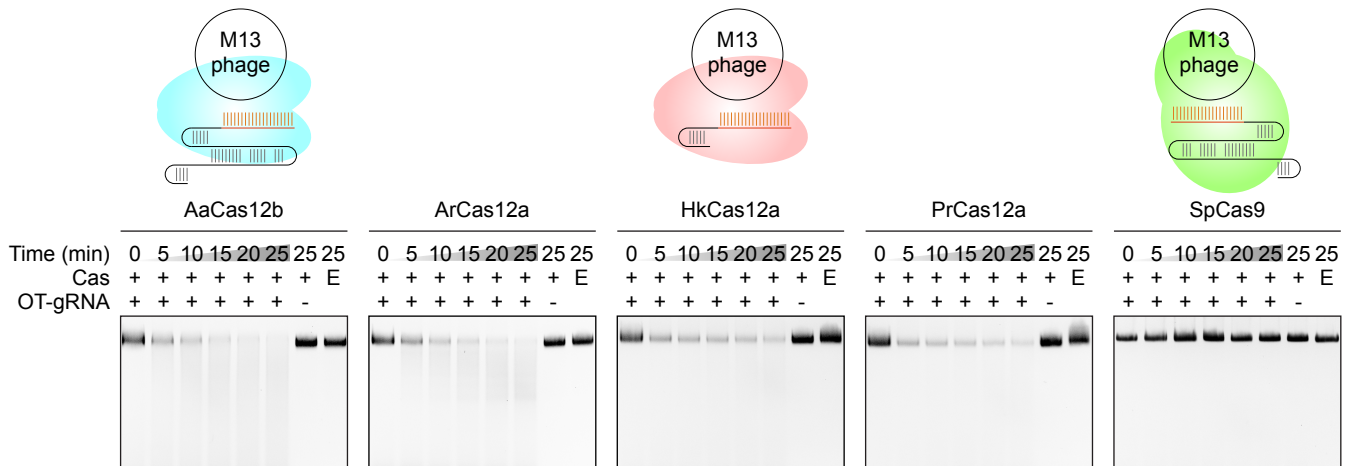

**c**

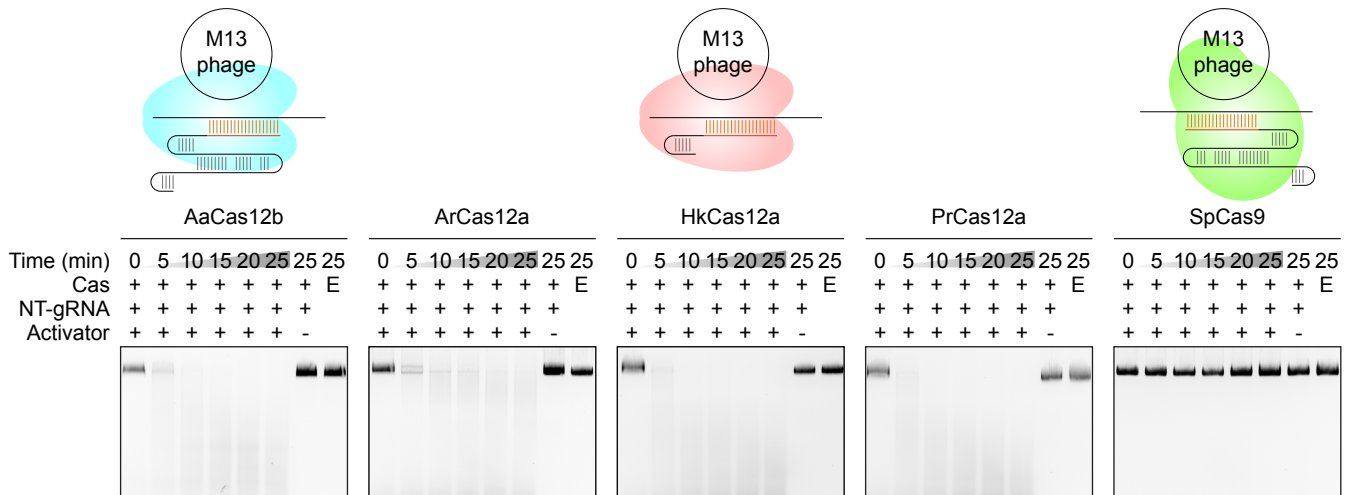

**Figure S1 Non-specific DNase activity is conserved across Cas12 proteins.** **a** Schematics illustrating Cas12b possesses the ability of canonical target recognition and cleavage of dsDNA, as well as non-canonical collateral cleavage of ssDNA. **b** M13mp18 ssDNA cleavage timecourses with purified AaCas12b, ArCas12a, HkCas12a, PrCas12a and SpCas9 coupled with an on-target guide RNA (OT-gRNA) complementary to M13 phage. **c** M13mp18 ssDNA cleavage timecourses with purified AaCas12b, ArCas12a, HkCas12a, PrCas12a and SpCas9 coupled with a non-target guide RNA (NT-gRNA) and complementary ssDNA activator with no sequence homology to M13 phage.

## Figure S2

**a**

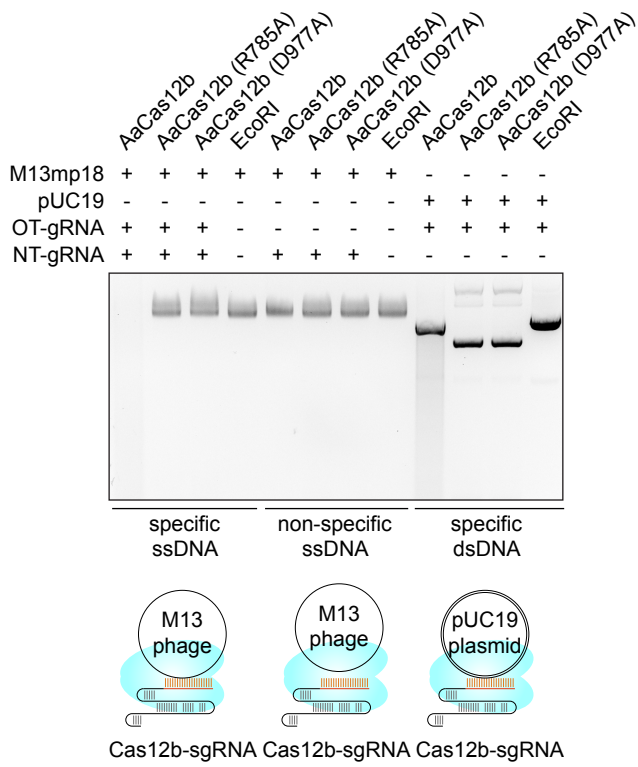

**b**

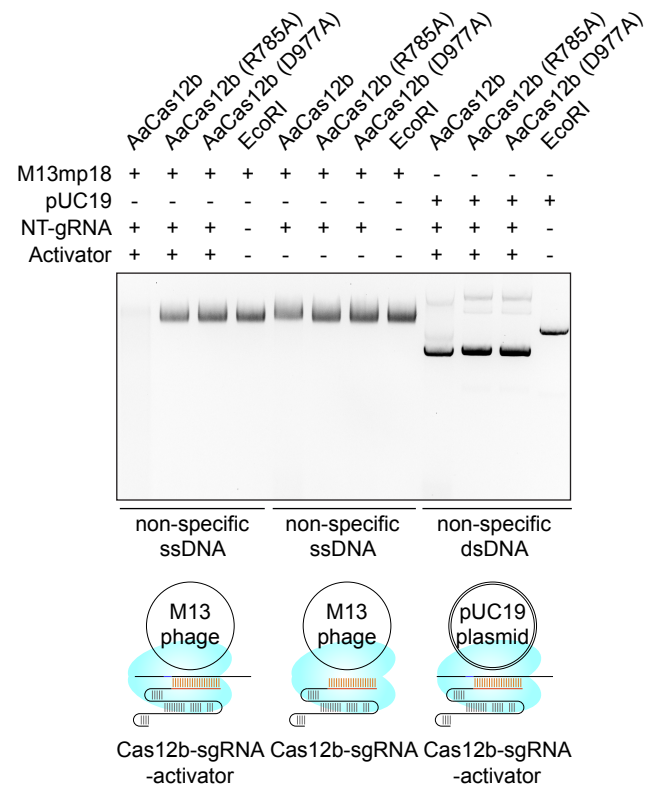

**Figure S2 The RuvC domain is responsible for ssDNA trans-cleavage. a-b** M13mp18 ssDNA substrate and pUC19 dsDNA cleavage timecourses with purified WT AaCas12b and RuvC catalytic mutants coupled with **an** on-target gRNA (OT-gRNA) or non-target gRNA (NT-gRNA) or **b** a NT-gRNA and complementary ssDNA activator with no sequence homology to M13 phage or pUC19.

# Figure S3

**a**

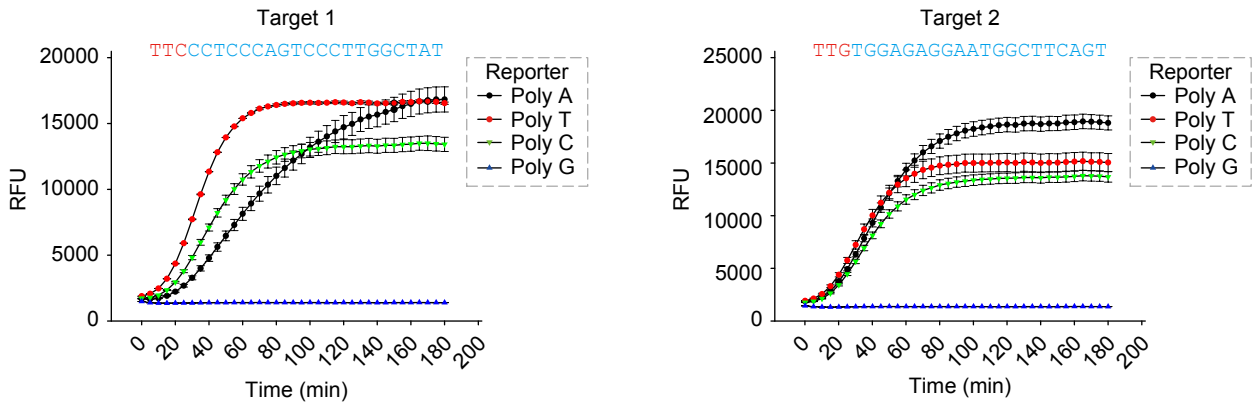

**b**

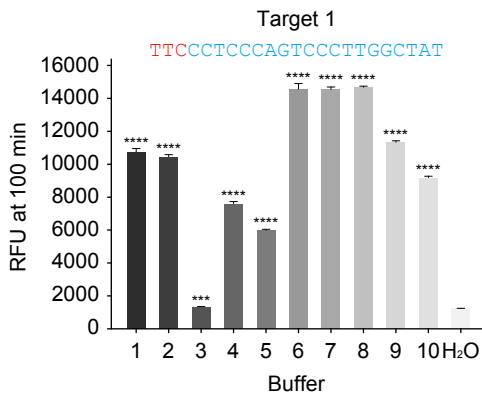

**c**

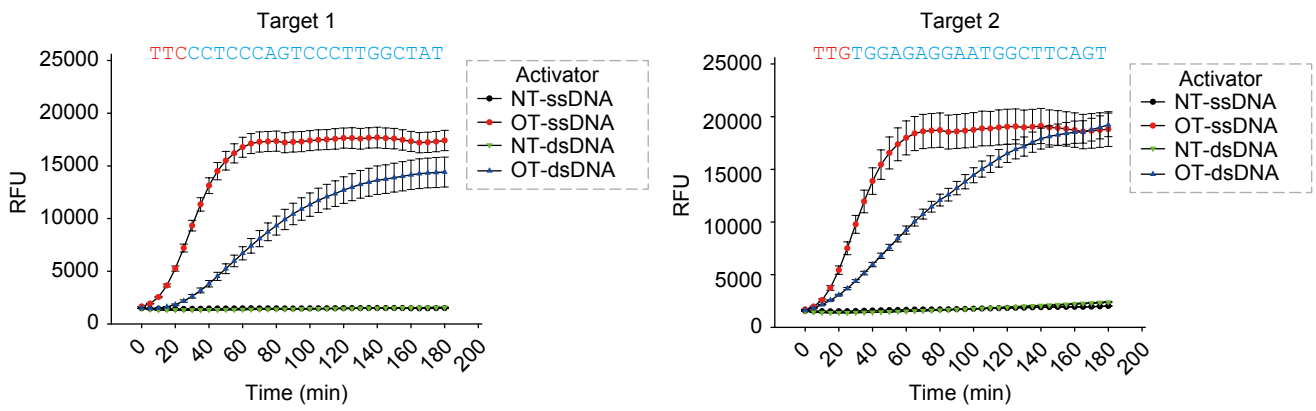

**Figure S3 Preference for Cas12b-mediated *trans*-activated cleavage of non-specific ssDNA.**

**a** Base preference of AaCas12b-mediated *trans*-cleavage of ssDNA reporters containing a homopolymer of A, T, G or C bases. AaCas12b is incubated with a sgRNA targeting a synthetic ssDNA 1 or 2. PAM sequences are colored in red, protospacers are colored in blue. Error bars indicate standard errors of the mean (s.e.m.),  $n = 3$ . RFU, relative fluorescence units. **b** A variety of buffers are tested for their effect on AaCas12b-mediated *trans*-cleavage activity. AaCas12b is incubated with a sgRNA targeting a synthetic dsDNA 1. Error bars indicate (s.e.m.),  $n = 3$ . Two-tailed Student's *t* test is used for significance analysis between test group and the control group (H<sub>2</sub>O), respectively. \*\*\* $P < 0.001$ ; \*\*\*\* $P < 0.0001$ . **c** *Trans*-cleavage activity analysis for AaCas12b using on-target-ssDNA (OT-ssDNA), non-target-ssDNA (NT-ssDNA), on-target-dsDNA (OT-dsDNA) and non-target-dsDNA (NT-dsDNA) as activator. AaCas12b is incubated with a sgRNA targeting a synthetic ssDNA 1 or 2. Error bars indicate s.e.m.,  $n = 3$ .

**Figure S4**

**a**

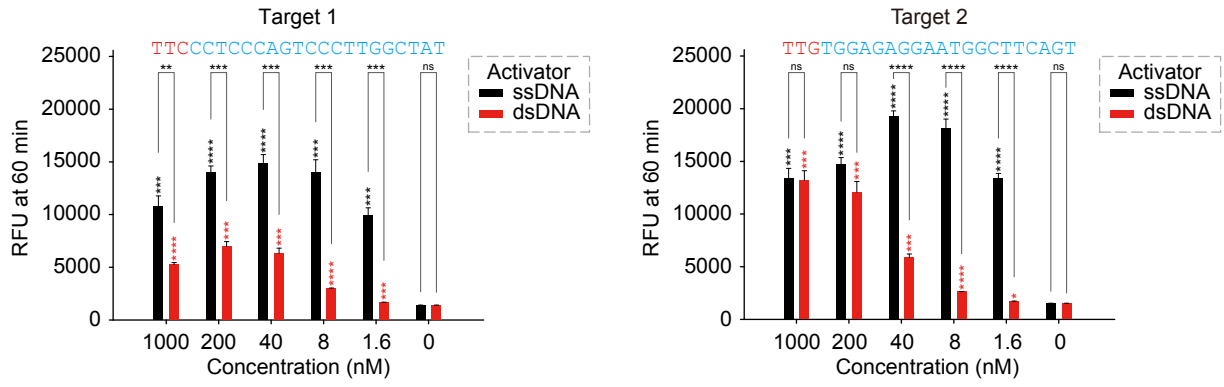

**b**

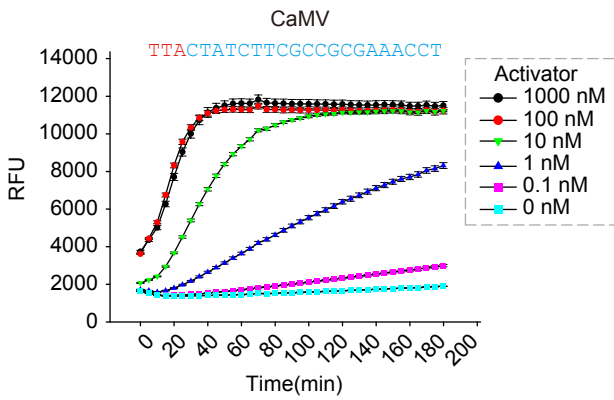

**c**

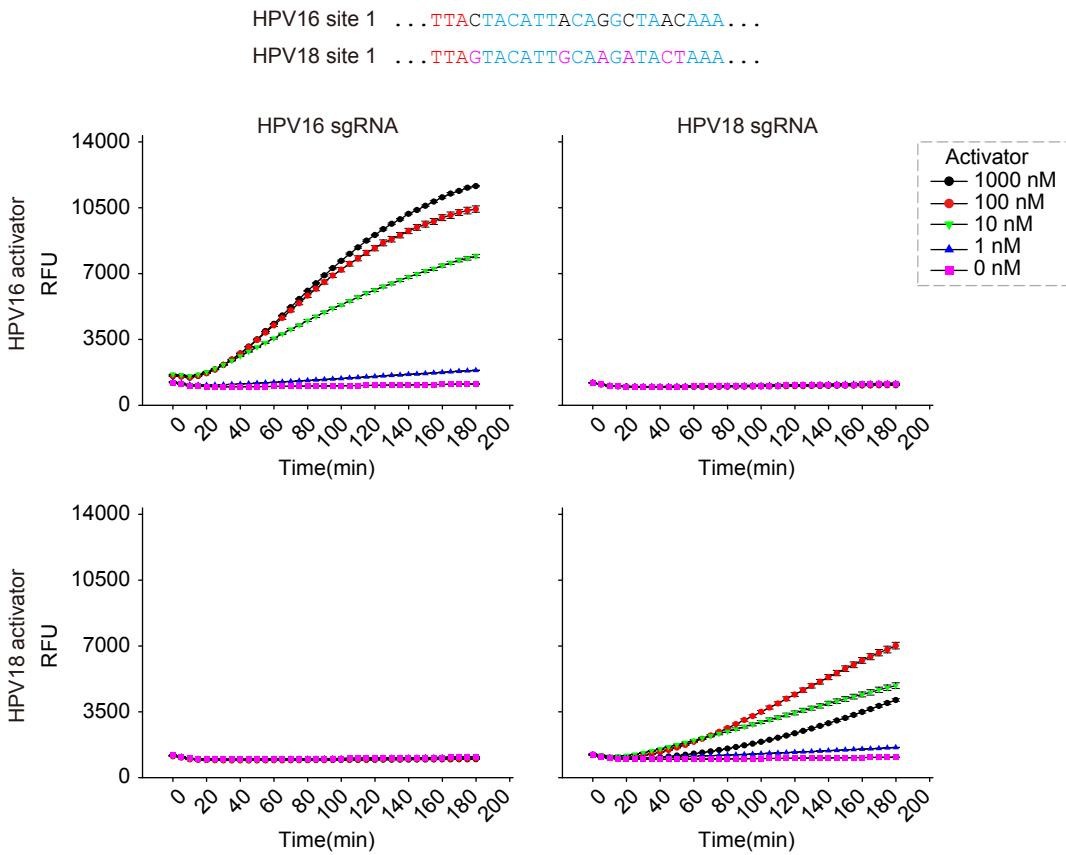

**d**

HPV16 site 2 ... **ATGT**CATTAT**GTGCTGCC**ATATCTACTT**CAGAA**...

HPV18 site 2 ... **TTAACA**ATAT**GTGCTTCTACACAGTCTCCTGTA**...

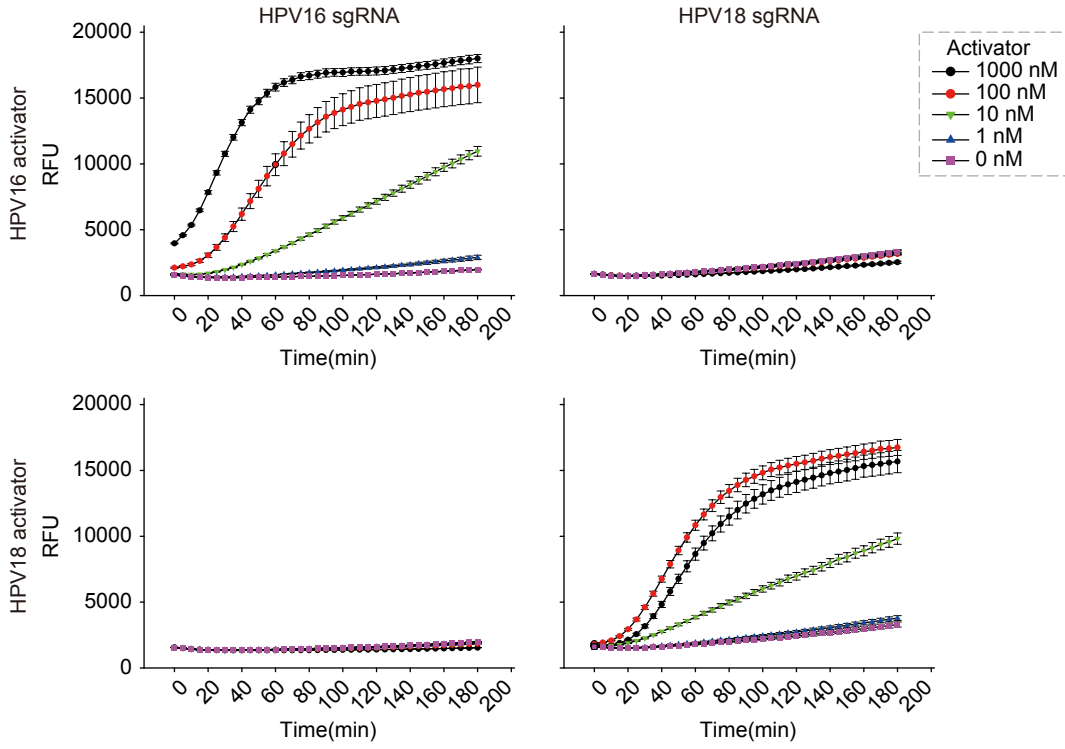**e**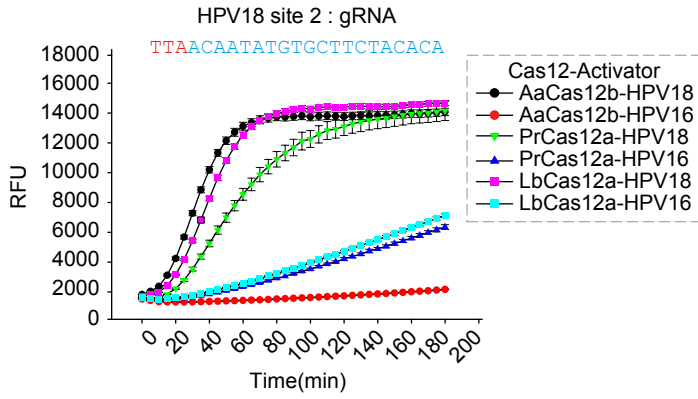**f**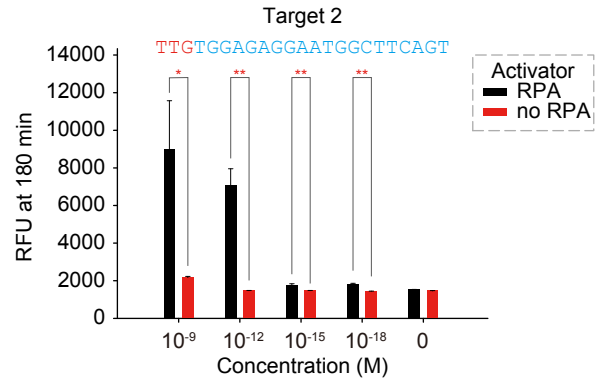



**Figure S4 Sensitivity and specificity of AaCas12b-mediated DNA detection.** **a** Comparison of *trans*-cleavage activity for AaCas12b using ssDNA or dsDNA activator without pre-amplification. AaCas12b is incubated with a sgRNA targeting a synthetic ssDNA or dsDNA. PAM sequences are colored in red, protospacers are colored in blue, SNPs are colored in pink. Error bars indicate standard errors of the mean (s.e.m.), n = 3. RFU, relative fluorescence units. Two-tailed Student's *t* test is used for significance analysis between test group and the control group (0 nM), respectively. **b** Fluorescence timecourses showing AaCas12b-sgRNA detects the existence of CaMV DNA. Error bars indicate (s.e.m.), n = 3. **c-d** (Upper) Schematics showing HPV16 and HPV18 sequences targeted by AaCas12b. Red highlighted bases indicate 5'PAM sequences; Blue and green highlighted bases indicate different nucleotides. (Lower) AaCas12b distinguishes two synthetic HPV sequences (HPV16 and HPV18) at **c** site 1 and **d** site 2. Error bars indicate (s.e.m.), n = 3. **e** Comparison of the specificity among AaCas12b, PrCas12a and LbCas12a in dsDNA distinguishability using synthetic HPV18 activator (site 2). Error bars indicate (s.e.m.), n = 3. **f** Comparison of *trans*-cleavage activity and pre-amplification enhanced *trans*-cleavage activity for AaCas12b using dsDNA activator. AaCas12b is incubated with a sgRNA targeting a synthetic ssDNA 2 or dsDNA 2. Error bars indicate (s.e.m.), n = 3. Two-tailed Student's *t* test is used for significance analysis between the two samples in group. \**P* < 0.05; \*\**P* < 0.01; \*\*\**P* < 0.001; \*\*\*\**P* < 0.0001.

**Figure S5**

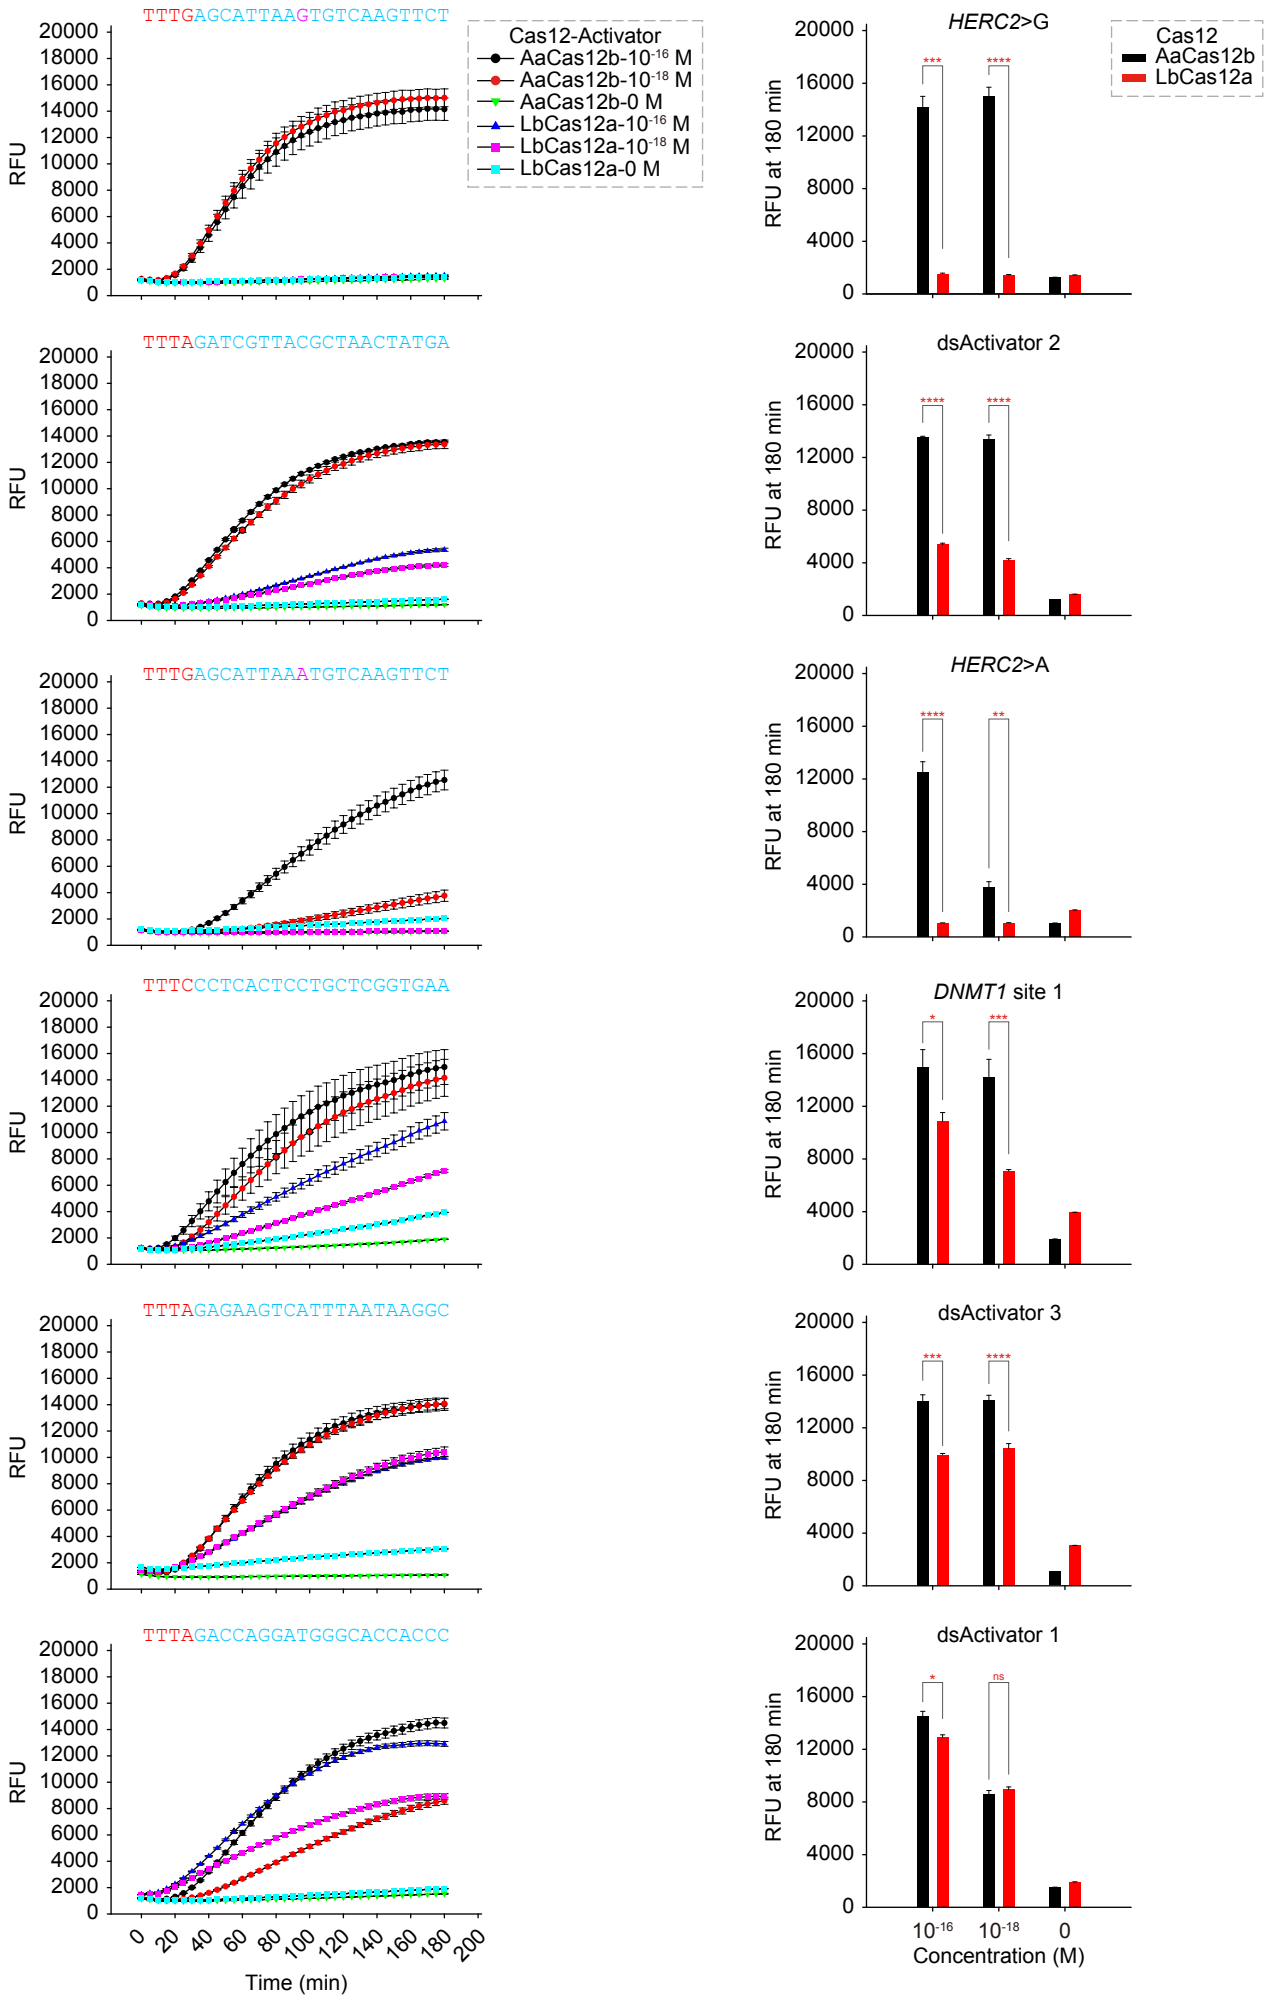

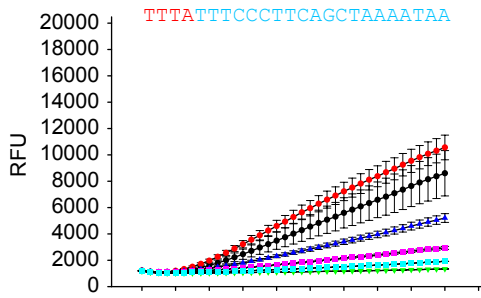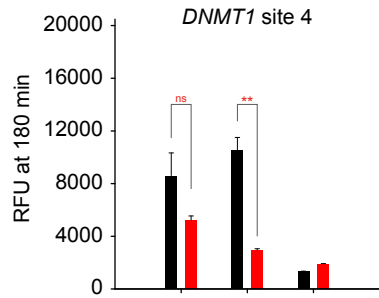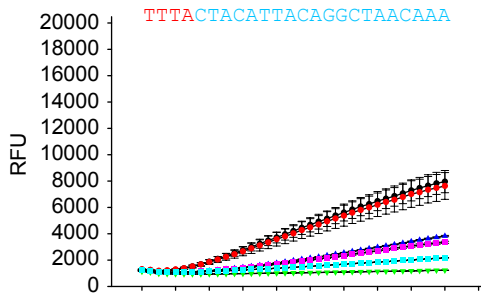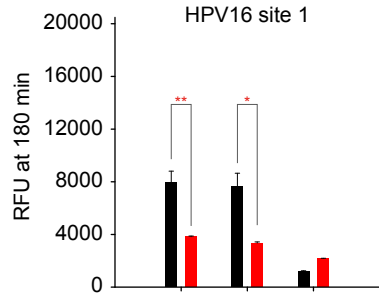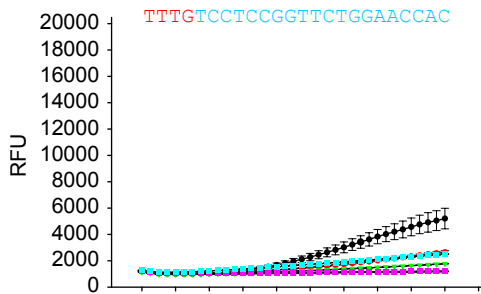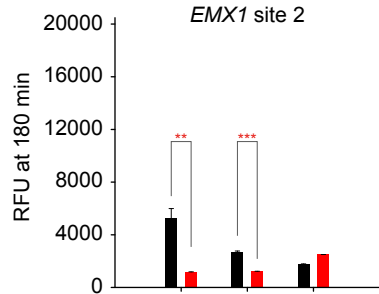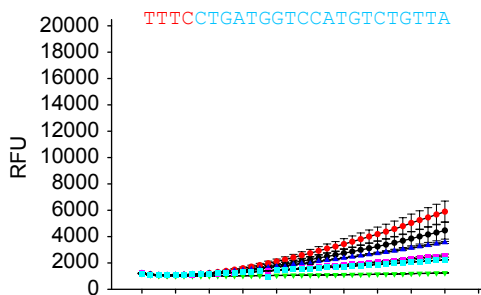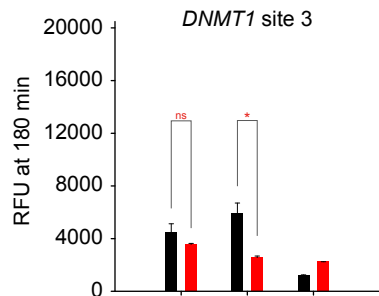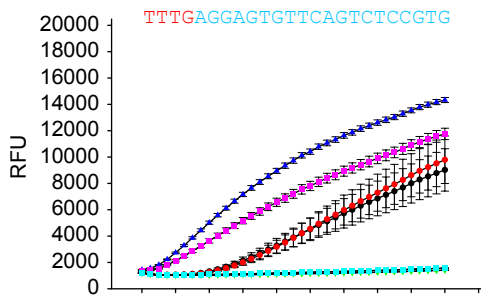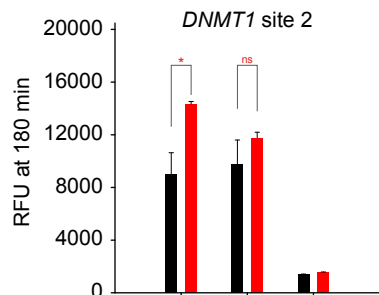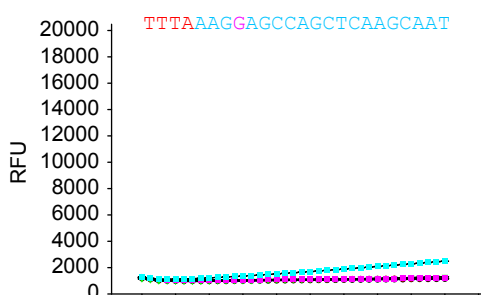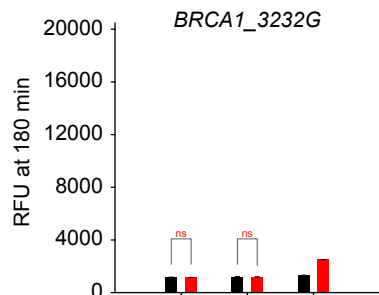

Time (min)

Concentration (M)

**Figure S5 Comparison of sensitivities of AaCas12b- and LbCas12a-based DNA detection.**

(Left) Fluorescence timecourses obtained from AaCas12b- and LbCas12a-based DNA detection with RPA pre-amplification. Cas12 proteins are incubated with their cognate gRNAs targeting synthetic dsDNAs with a final concentration of  $10^{-16}$  M and  $10^{-18}$  M. PAM sequences are colored in red, protospacers are colored in blue, SNPs are colored in pink. Error bars indicate standard errors of the mean s.e.m.,  $n = 3$ . (Right) Maximum fluorescence signal obtained from timecourses in the left panel. Error bars indicate (s.e.m.),  $n = 3$ . Two-tailed Student's  $t$  test is used for significance analysis between the two samples in group.  $*P < 0.05$ ;  $**P < 0.01$ ;  $***P < 0.001$ ;  $****P < 0.0001$ ; ns, no significance.

# Figure S6

**a**

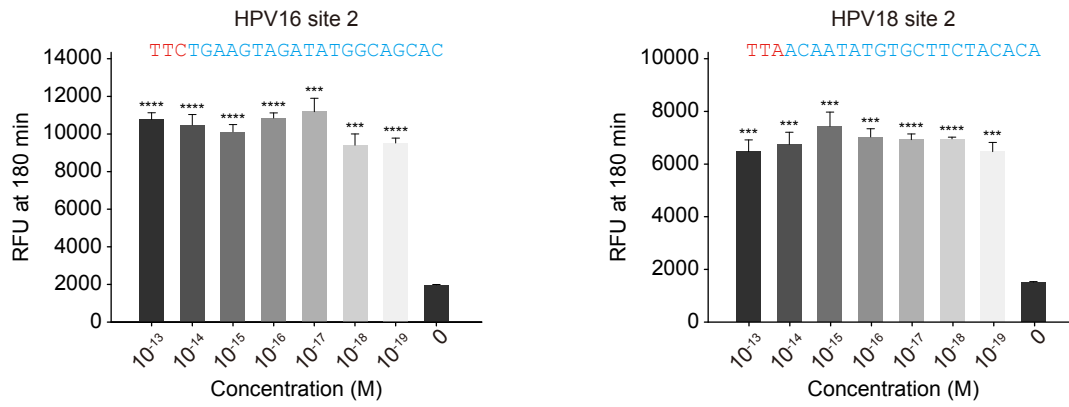

**b**

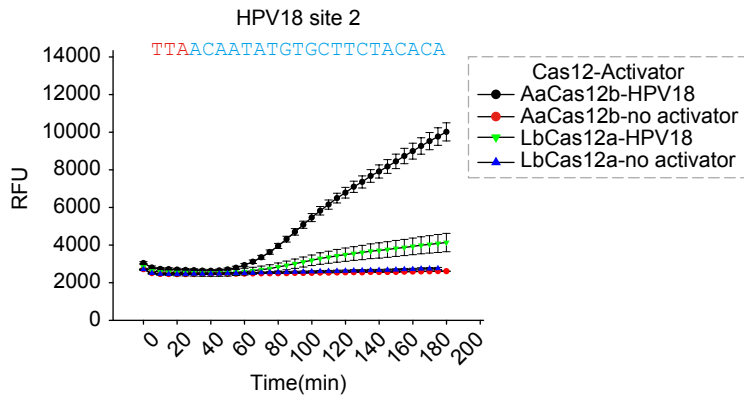

**Figure S6 CDetection achieves sub-attomolar sensitivity in DNA detection. a** CDetection achieves sub-attomolar ( $0.1 \text{ aM}$ ) sensitivity in detection of HPV16 and HPV18 dsDNAs mixed with background genome. PAM sequences are colored in red, protospacers are colored in blue. Error bars indicate standard errors of the mean (s.e.m.),  $n = 3$ . RFU, relative fluorescence units. Two-tailed Student's  $t$  test is used for significance analysis between test group and the control group ( $0 \text{ nM}$ ), respectively.  $***P < 0.001$ ;  $****P < 0.0001$ . **b** Fluorescence timecourses obtained from AaCas12b- and LbCas12a-based DNA detection with RPA pre-amplification. Cas12 is incubated with a cognate gRNA targeting a synthetic HPV18 dsDNA diluted in human plasma with a final concentration of  $10^{-18} \text{ M}$ . Error bars indicate (s.e.m.),  $n = 3$ .

**Figure S7**

**a**

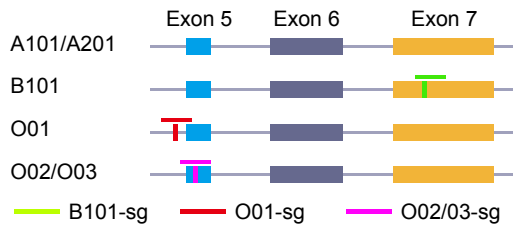

| ABO       | sgRNA |     |        |
|-----------|-------|-----|--------|
|           | B101  | O01 | O02/03 |
| A101/A201 | -     | -   | -      |
| B101      | +     | -   | -      |
| O01       | -     | +   | -      |
| O02/O03   | -     | -   | +      |

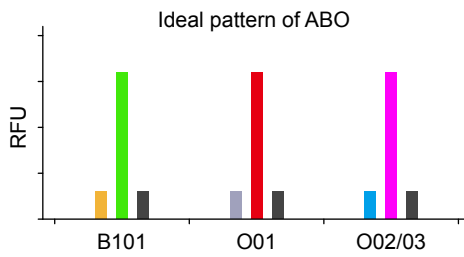

**b**

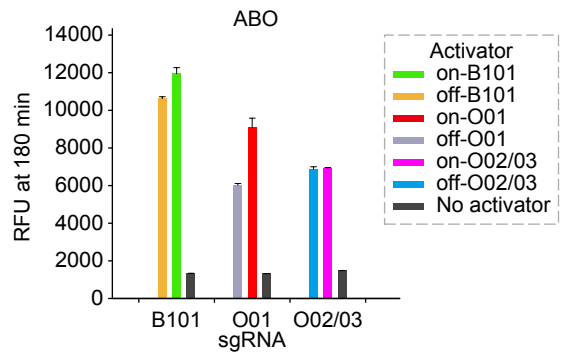

**c**

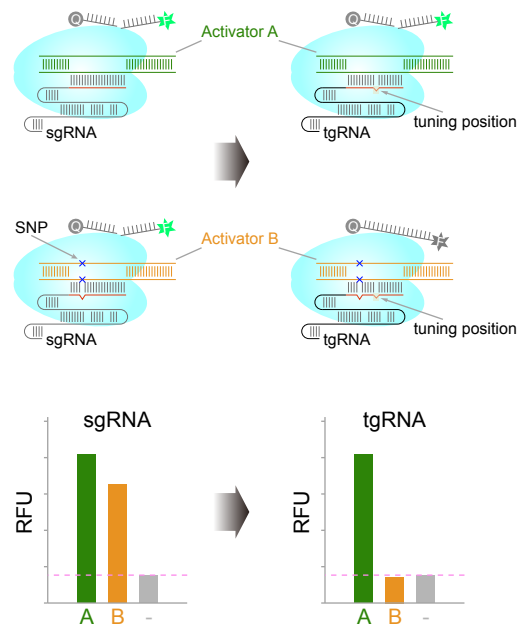

**Figure S7 Develop CDetection platform.** **a** (*Upper*) Schematics showing the ABO blood genotyping detected by CDetection. Six common ABO alleles and three targeting sgRNAs are shown. PAM sequences are colored in red, protospacers are colored in blue, SNPs are colored in pink, base substitution in tgRNAs are colored in orange. (*Lower*) Each sgRNA distinguishes an identical allele with detectable signal. If all three sgRNAs produce no signal, the allele is A101 or A201. **b** Fluorescence single obtained in ABO blood genotyping detection using CDetection. CDetection cannot distinguish two dsDNA activators differed by only one single-base polymorphism (on-B101 *vs.* off-B101, on-O01 *vs.* off-O01, on-O02/03 *vs.* off-O02/03). Error bars indicate standard errors of the mean (s.e.m.), n = 3. RFU, relative fluorescence units. **c** (*Upper*) Schematics showing the development of CDetection by introducing tuned gRNA (tgRNA). (*Lower*) CDetection using sgRNA cannot distinguish two dsDNA activators differed by a single mismatch, while CDetection using tgRNA, which bears a mismatch within the spacer sequence, can achieve DNA detection with a single-base-resolution.



# Figure S8

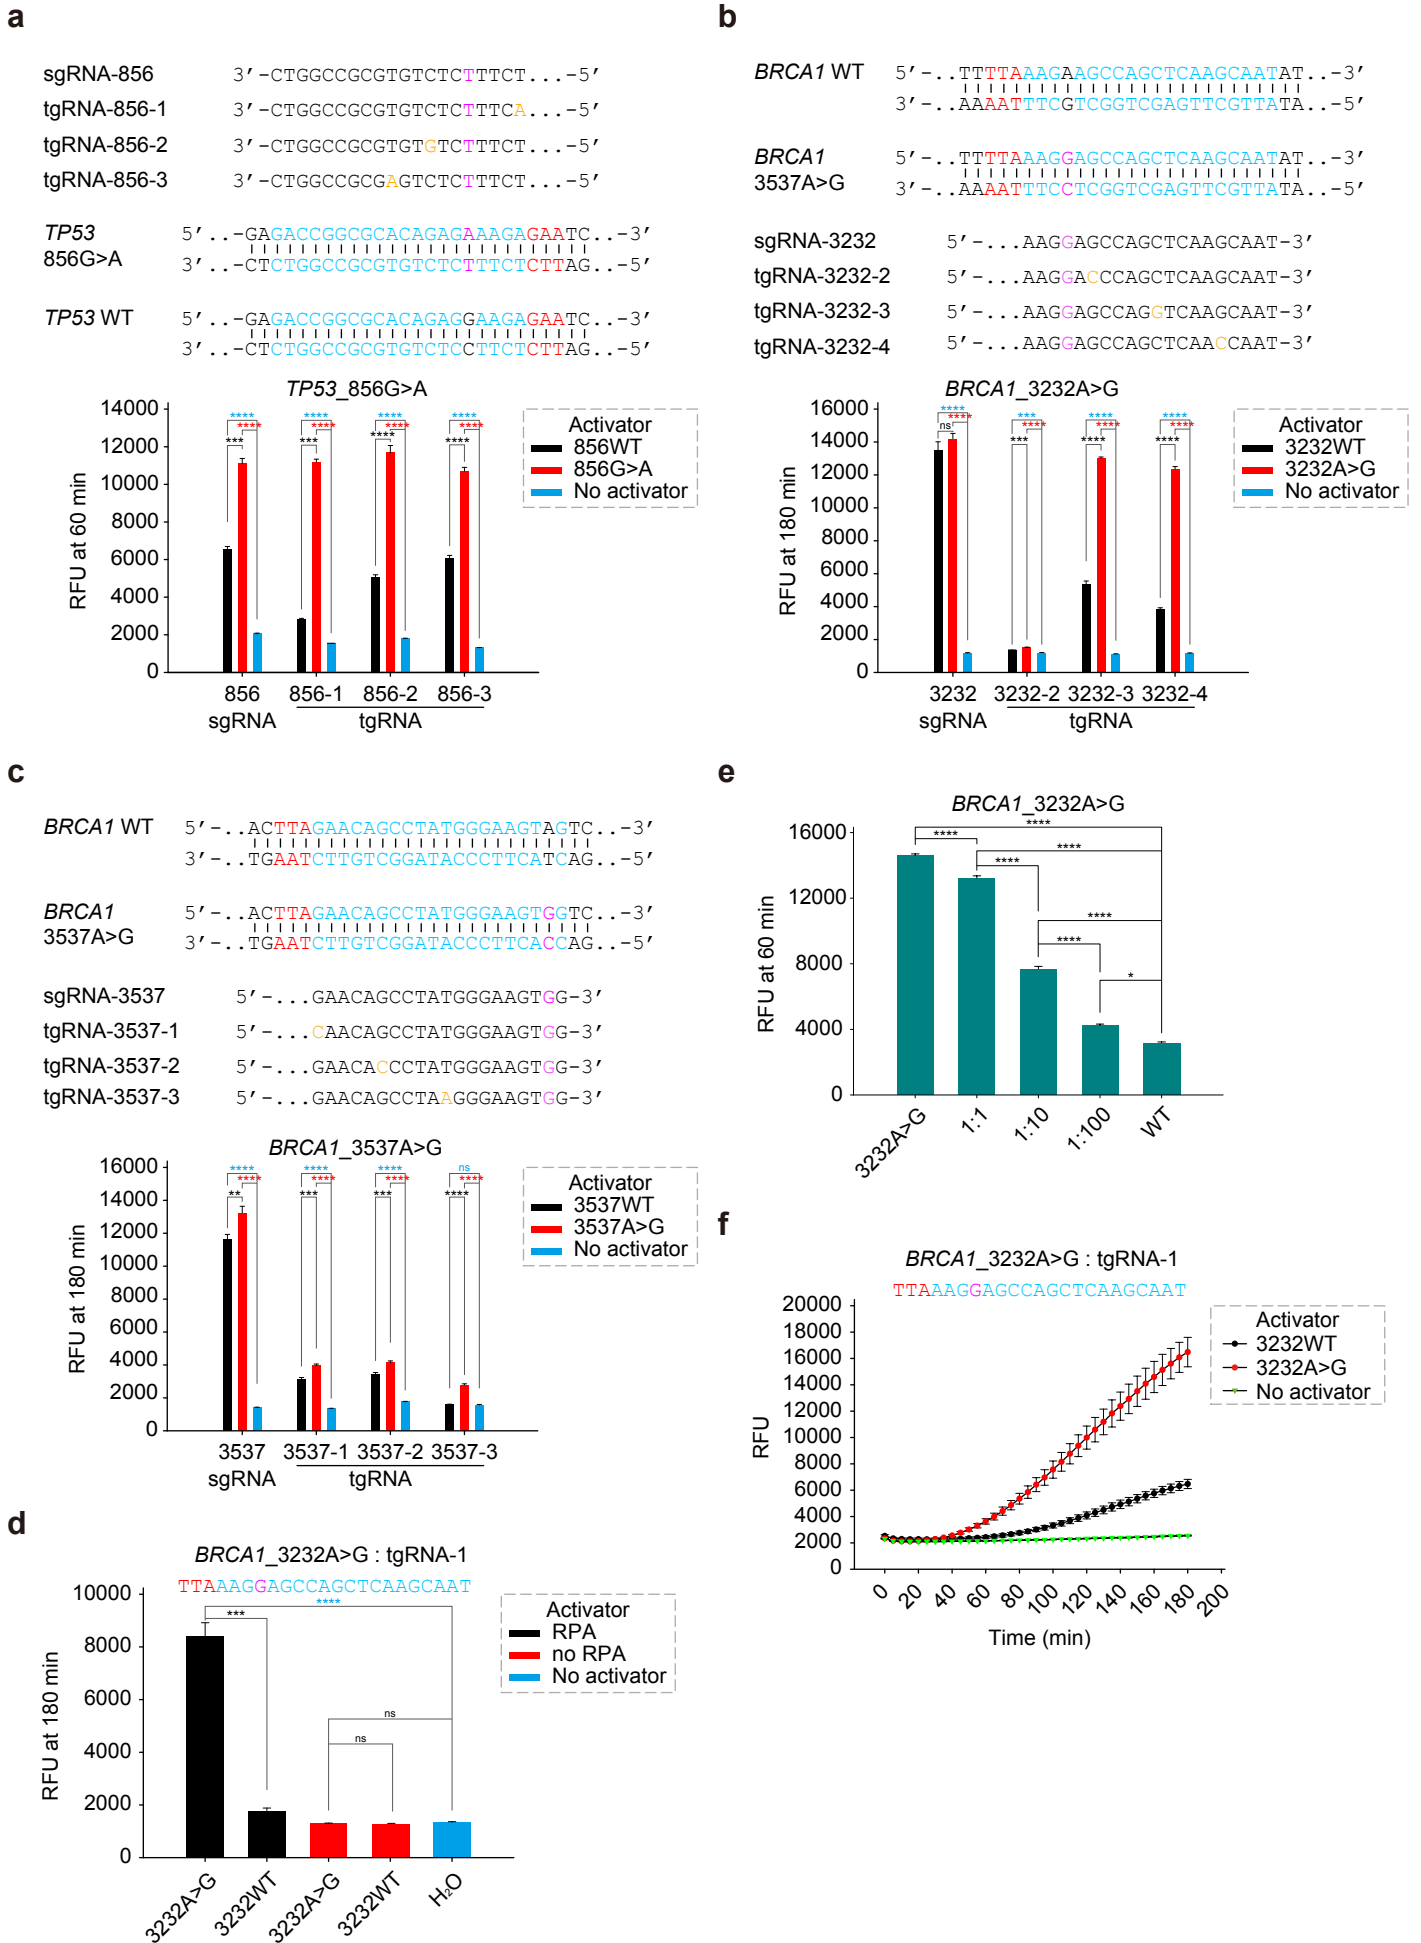

**Figure S8 Accurate DNA detection using CDetection platform.** **a** (*Upper*) Schematics showing the sequence variation within *TP53* gene along with targeting sgRNA and tgRNAs. PAM sequences are colored in red, protospacers are colored in blue, SNPs are colored in pink, base substitution in tgRNAs are colored in orange. (*Lower*) Maximum fluorescence signal showing the sensitivity for human *TP53* 856G>A mutation detection using sgRNA and tgRNAs. Error bars indicate standard errors of the mean (s.e.m.), n = 3. RFU, relative fluorescence units; tgRNA, tuned guide RNA. Two-tailed Student's *t* test is used for significance analysis among each other in group. **(b-c)** (*Upper*) Schematics showing the sequence variation within *BRCA1* gene along with targeting sgRNA and tgRNAs. (*Lower*) Maximum fluorescence signal showing the sensitivity for human *BRCA1* **b** 3232A>G and **c** 3537A>G mutation detection using sgRNA and tgRNAs. Error bars indicate (s.e.m.), n = 3. Two-tailed Student's *t* test is used for significance analysis among each other in group. **d** Maximum fluorescence signal obtained from timecourses in **Fig. 2d**. CDetection is conducted using RPA-amplified dsDNAs from genomic DNAs or genomic DNAs without RPA-amplification directly. *BRCA1* wild-type genomic DNAs or 3232A>G mutant genomic DNAs are extracted from cell lines. Error bars indicate (s.e.m.), n = 3. Two-tailed Student's *t* test is used for significance analysis among each other in group. **e** Maximum fluorescence signal showing the sensitivity for human *BRCA1* 3232A>G detection using selected tgRNA (*BRCA1*\_3232A>G tgRNA-1). Mutant DNAs (*BRCA1*\_3232A>G), wildtype DNAs (*BRCA1*\_3232WT) and mixtures (mutant:WT = 1:1, 1:10 and 1:100) are used in CDetection analysis. *BRCA1* wild-type genomic DNAs or 3232A>G mutant genomic DNAs are extracted from cell lines. Error bars indicate standard errors of the mean (s.e.m.), n = 3. Two-tailed Student's *t* test is used for significance analysis among each other. **f** Fluorescence timecourses showing the sensitivity and specificity of CDetection with RPA for human *BRCA1* 3232A>G mutation detection using tgRNA (3232-1). Wild-type *BRCA1* or *BRCA1* 3232A>G dsDNAs are diluted in human plasma with a final concentration of  $10^{-16}$  M. Error bars indicate (s.e.m.), n = 3. \*\**P* < 0.01; \*\*\**P* < 0.001; \*\*\*\**P* < 0.0001; ns, no significance.

**Figure S9**

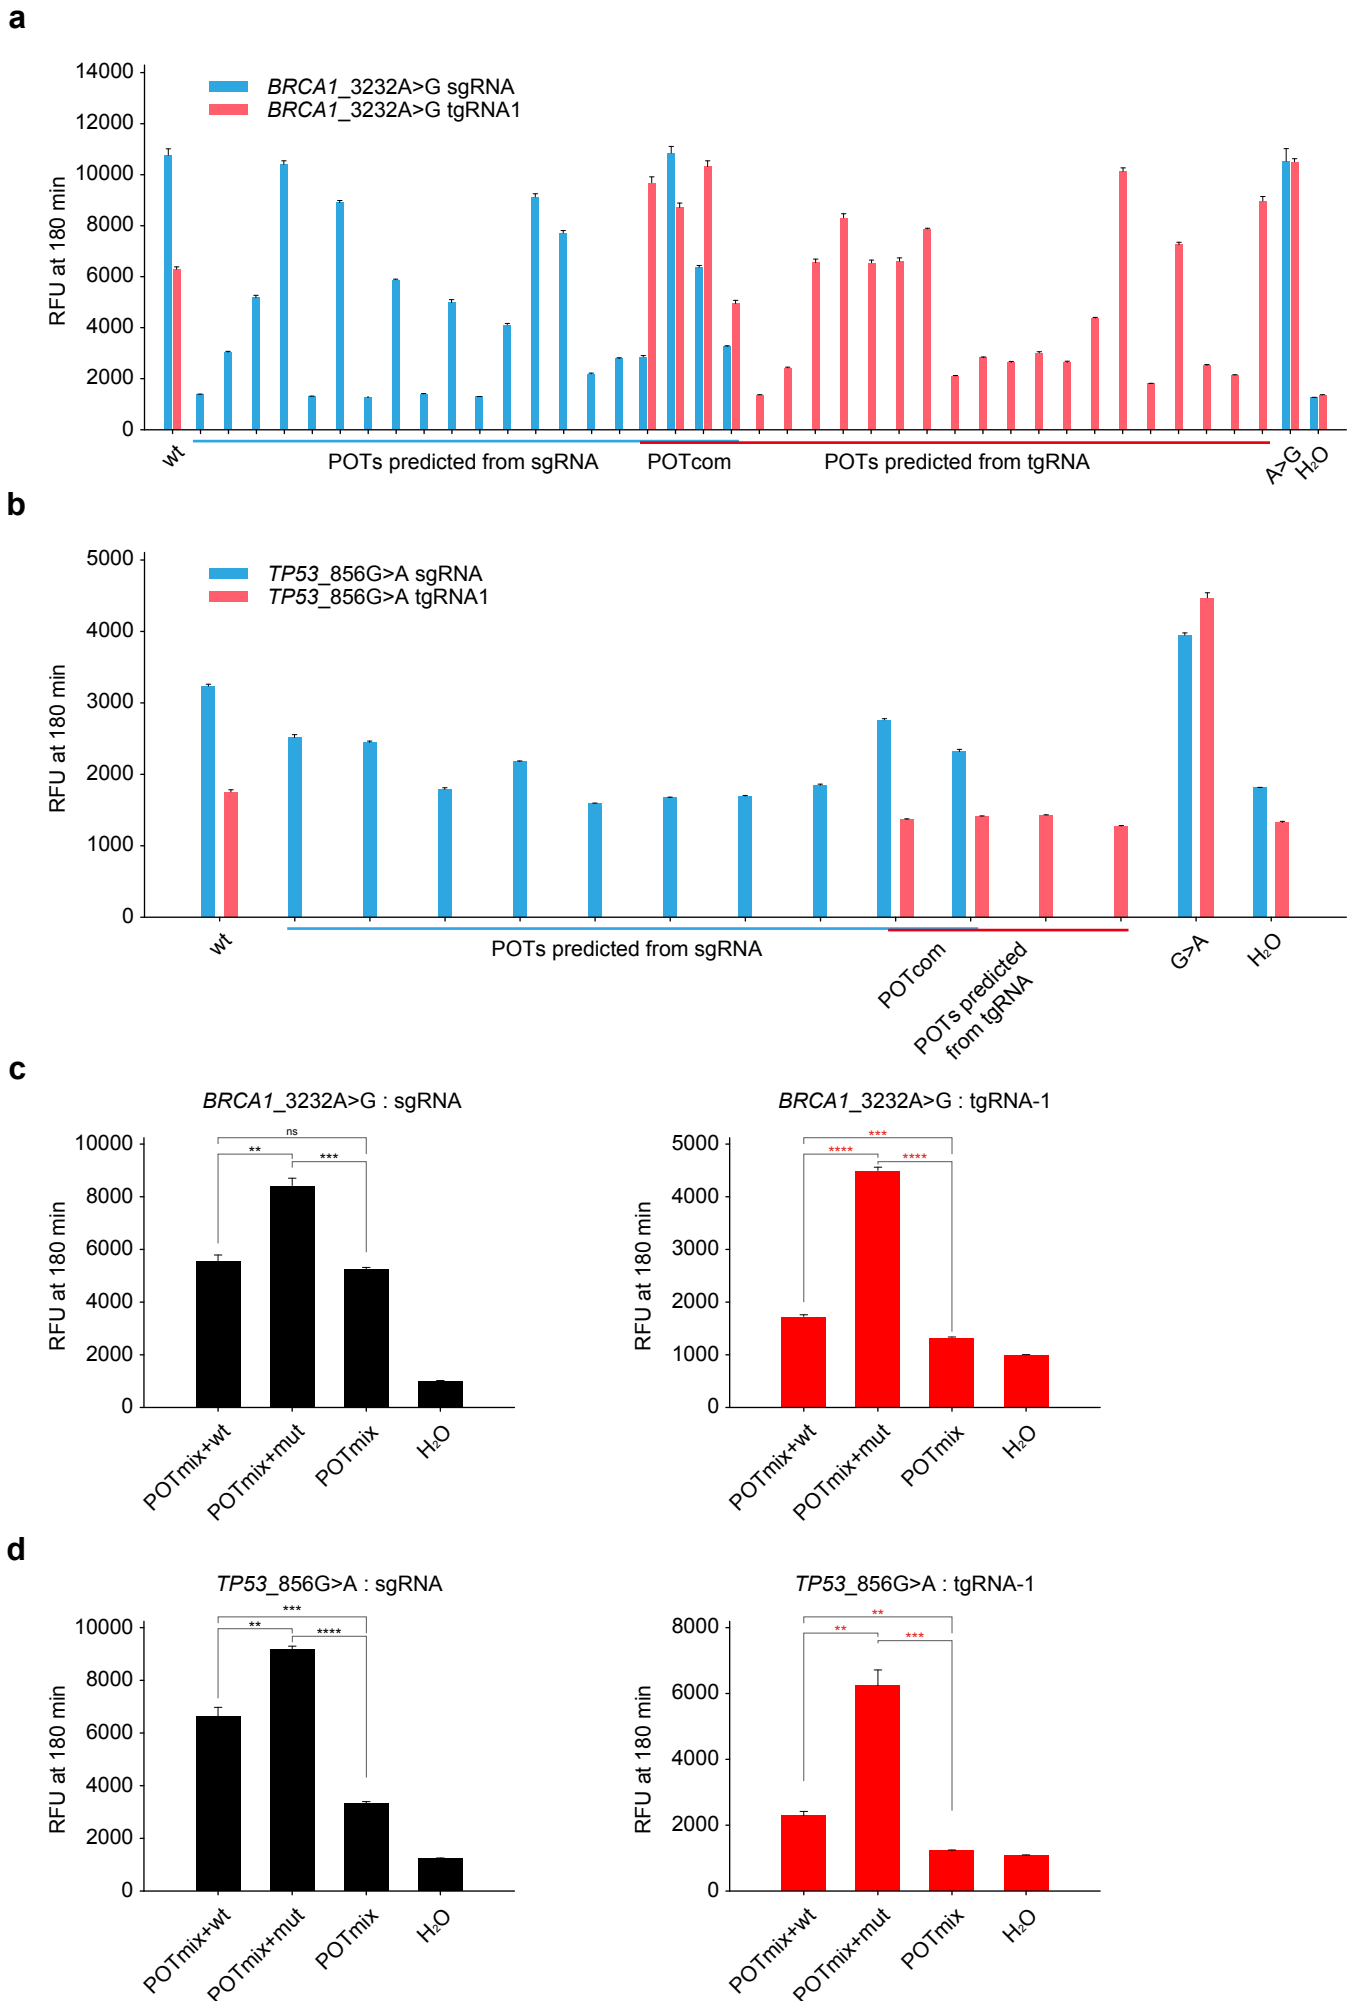

**Figure S9 Potential off-target analysis of CDetection.** **a-b** Maximum fluorescence signal obtained from sgRNA- and tgRNA-based CDetection using potential off-targets without RPA pre-amplification. AaCas12b is incubated with sgRNA or tgRNA targeting their cognate synthetic **a** *BRCA1* 3232A>G or **b** *TP53* 856 G>A off-target dsDNAs individually. Potential off-target sites bearing 1 to 3 mismatches are predicted using Cas-OFFinder. POT, potential off-target; POTcom, common POTs predicted from both sgRNA and tgRNA. Error bars indicate standard errors of the mean (s.e.m.), n = 3. **c-d** Maximum fluorescence signal obtained from sgRNA or tgRNA-based CDetection using mixed off-targets after RPA pre-amplification. All potential off-targets from sgRNA and tgRNA targeting **c** *BRCA1* 3232A<G or **d** *TP53* G>A are mixed together and amplified using RPA. POTmix, mixture of all potential off-targets of sgRNA and tgRNA. POTmix+wt, mixture of POTmix and wild-type on-target DNA substrate. POTmix+mut, mixture of POTmix and mutant on-target DNA substrate. Error bars indicate (s.e.m.), n = 3. Two-tailed Student's *t* test is used for significance analysis. \*\**P* < 0.01; \*\*\**P* < 0.001; \*\*\*\**P* < 0.0001; ns, no significance.

**Figure S10**

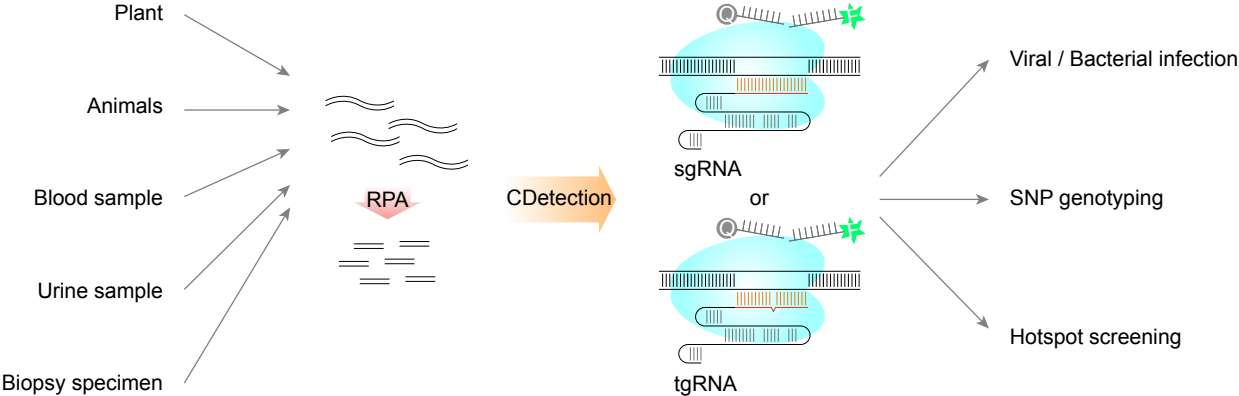

**Figure S10 Rapid and accurate diagnostic applications of CDetection.** Schematics illustration of the wide applications of CDetection platform. Crude genomic DNAs are obtained from various samples via directly lysed for clinical diagnostics and quarantine inspection. For different purposes, DNAs with or without RPA were applied for Cas12b-based detection combined with sgRNA or tgRNA.

**Figure S11**

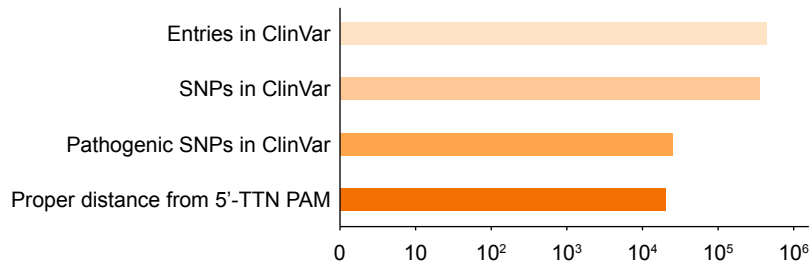

**Figure S11 Genetic variants from ClinVar that, in principle, can be detected by CDetection platform.** The NCBI ClinVar database of human genetic variations and their corresponding phenotypes is searched for genetic disease that can be detected by CDetection platform. The results are filtered by imposing successive restrictions and the qualified number is shown on a logarithmic scale.
