# Supplementary material for: CDetection: CRISPR-Cas12b-based DNA detection with sub-attomolar sensitivity and single-base specificity
Source: PubMed Central journal article supplement (PMC6604390; doi:10.1186/s13059-019-1742-z), 2019-07-01
Supplement: 13059_2019_1742_MOESM2_ESM.pdf [file 13059_2019_1742_MOESM2_ESM.pdf]

**Table S1. Nucleic acids used in this study.** The PAM sequences are colored in blue, mismatches in red and T7 promoter sequences in green, respectively. Protospacer and spacer sequences are underlined.

| <b>DNA</b>                          |                                                                                                                                      |
|-------------------------------------|--------------------------------------------------------------------------------------------------------------------------------------|
| Target 1 <sup>a</sup> _NTS-50       | TCCAGAATGGCT <u>TTC</u> CCTCCCAGTCCCTTGGCTATGGAATATGTTAATG                                                                           |
| Target 1 <sup>a</sup> _TS-50        | CATTAACATATTCCATAGCCAAGGGACTGGGAGG <u>GAA</u> AGCCATTCTGGGA                                                                          |
| Target 1 <sup>a</sup> _NTS-100      | TCTGCTCAGTCCCAGAATGGCT <u>TTC</u> CCTCCCAGTCCCTTGGCTA <u>TGGAATATGTTAATGACTTTGATTTGATGAAGTTCGAAATAAAGCGGGAGCCTTCT</u>                |
| Target 1 <sup>a</sup> _TS-100       | AGAAGGCTCCCGCTTTATTTTCGAAC TTCATCAAATCAAAGTCATTAACATATTCCATAGCCAAGGGACTGGGAGG <u>GAA</u> AGCCATTCTGGACTGAGCAGA                       |
| Target 2 <sup>a</sup> _NTS-50       | GCTGCTGTGAAGA <u>TTG</u> TGGAGAGGAATGGCTTCAGTGATAAGATTAAAGT                                                                          |
| Target 2 <sup>a</sup> _TS-50        | ACTTTAATCTTATCACTGAAGCCATTCTCTCCA <u>CAAT</u> CTTCACAGCAGC                                                                           |
| Target 2 <sup>a</sup> _NTS-100      | TAAGCCTATGGCTGAGGCTGCTGTGAAGA <u>TTG</u> TGGAGAGGAATG <u>GCTTCAGTGATAAGATTAAAGTCATTAACAAGCACTCCACTGAGGTGACAGTCGGA</u>                |
| Target 2 <sup>a</sup> _TS-100       | TCCGACTGTCACCTCAGTGGAGTGCTTGTTAATGACTTTAATCTTATCACTGAAGCCATTCTCTCCA <u>CAAT</u> CTTCACAGCAGCCTCAGCCATAGGCTTA                         |
| Target 1 <sup>a</sup> _NTS-100-mPAM | TCTGCTCAGTCCCAGAATGGCT <u>AAC</u> CCTCCCAGTCCCTTGGCTA <u>TGGAATATGTTAATGACTTTGATTTGATGAAGTTCGAAATAAAGCGGGAGCCTTCT</u>                |
| Target 1 <sup>a</sup> _TS-100-mPAM  | AGAAGGCTCCCGCTTTATTTTCGAAC TTCATCAAATCAAAGTCATTAACATATTCCATAGCCAAGGGACTGGGAGG <u>GTT</u> AGCCATTCTGGACTGAGCAGA                       |
| Target 1 <sup>a</sup> _NTS-100-m1   | TCTGCTCAGTCCCAGAATGGCT <u>TTC</u> <u>G</u> CCTCCCAGTCCCTTGGCTA <u>TGGAATATGTTAATGACTTTGATTTGATGAAGTTCGAAATAAAGCGGGAGCCTTCT</u>       |
| Target 1 <sup>a</sup> _TS-100-m1    | AGAAGGCTCCCGCTTTATTTTCGAAC TTCATCAAATCAAAGTCATTAACATATTCCATAGCCAAGGGACTGGGAG <u>C</u> <u>GAA</u> AGCCATTCTGGACTGAGCAGA               |
| Target 1 <sup>a</sup> _NTS-100-m3   | TCTGCTCAGTCCCAGAATGGCT <u>TTC</u> <u>CC</u> <u>A</u> CCAGTCCCTTGGCTA <u>TGGAATATGTTAATGACTTTGATTTGATGAAGTTCGAAATAAAGCGGGAGCCTTCT</u> |

|                                    |                                                                                                                                                          |
|------------------------------------|----------------------------------------------------------------------------------------------------------------------------------------------------------|
| Target 1 <sup>a</sup> _TS-100-m3   | AGAAGGCTCCCGCTTTATTTTCGAACTTCATCAAATCAAAGTCAT<br>TAACATATTCCATAGCCAAGGGACTGGG <u>TGG</u> GAAAGCCATTCTG<br>GGACTGAGCAGA                                   |
| Target 1 <sup>a</sup> _NTS-100-m5  | TCTGCTCAGTCCCAGAATGGCT <u>TTC</u> CCTC <u>G</u> CAGTCCCTTGGCTA<br><u>T</u> GGAATATGTTAATGACTTTGATTTGATGAAGTTCGAAATAAAG<br>CGGGAGCCTTCT                   |
| Target 1 <sup>a</sup> _TS-100-m5   | AGAAGGCTCCCGCTTTATTTTCGAACTTCATCAAATCAAAGTCAT<br>TAACATATTCCATAGCCAAGGGACTG <u>C</u> GAGG <u>GAA</u> AGCCATTCTG<br>GGACTGAGCAGA                          |
| Target 1 <sup>a</sup> _NTS-100-m7  | TCTGCTCAGTCCCAGAATGGCT <u>TTC</u> CCTCC <u>C</u> TGTCCTTGGCTA<br><u>T</u> GGAATATGTTAATGACTTTGATTTGATGAAGTTCGAAATAAAG<br>CGGGAGCCTTCT                    |
| Target 1 <sup>a</sup> _TS-100-m7   | AGAAGGCTCCCGCTTTATTTTCGAACTTCATCAAATCAAAGTCAT<br>TAACATATTCCATAGCCAAGGGAC <u>A</u> GGGAGG <u>GAA</u> AGCCATTCTG<br>GGACTGAGCAGA                          |
| Target 1 <sup>a</sup> _NTS-100-m9  | TCTGCTCAGTCCCAGAATGGCT <u>TTC</u> CCTCC <u>C</u> AG <u>A</u> CCCTTGGCTA<br><u>T</u> GGAATATGTTAATGACTTTGATTTGATGAAGTTCGAAATAAAG<br>CGGGAGCCTTCT          |
| Target 1 <sup>a</sup> _TS-100-m9   | AGAAGGCTCCCGCTTTATTTTCGAACTTCATCAAATCAAAGTCAT<br>TAACATATTCCATAGCCAAGGG <u>T</u> CTGGGAGG <u>GAA</u> AGCCATTCTG<br>GGACTGAGCAGA                          |
| Target 1 <sup>a</sup> _NTS-100-m11 | TCTGCTCAGTCCCAGAATGGCT <u>TTC</u> CCTCC <u>C</u> AGT <u>C</u> GCTTGGCTA<br><u>T</u> GGAATATGTTAATGACTTTGATTTGATGAAGTTCGAAATAAAG<br>CGGGAGCCTTCT          |
| Target 1 <sup>a</sup> _TS-100-m11  | AGAAGGCTCCCGCTTTATTTTCGAACTTCATCAAATCAAAGTCAT<br>TAACATATTCCATAGCCAAG <u>C</u> GACTGGGAGG <u>GAA</u> AGCCATTCTG<br>GGACTGAGCAGA                          |
| Target 1 <sup>a</sup> _NTS-100-m13 | TCTGCTCAGTCCCAGAATGGCT <u>TTC</u> CCTCC <u>C</u> AGTCC <u>C</u> A <u>T</u> GGCTA<br><u>T</u> GGAATATGTTAATGACTTTGATTTGATGAAGTTCGAAATAAAG<br>CGGGAGCCTTCT |
| Target 1 <sup>a</sup> _TS-100-m13  | AGAAGGCTCCCGCTTTATTTTCGAACTTCATCAAATCAAAGTCAT<br>TAACATATTCCATAGCCA <u>T</u> GGGACTGGGAGG <u>GAA</u> AGCCATTCTG<br>GGACTGAGCAGA                          |
| Target 1 <sup>a</sup> _NTS-100-m15 | TCTGCTCAGTCCCAGAATGGCT <u>TTC</u> CCTCC <u>C</u> AGTCCCTT <u>C</u> GCTA<br><u>T</u> GGAATATGTTAATGACTTTGATTTGATGAAGTTCGAAATAAAG<br>CGGGAGCCTTCT          |
| Target 1 <sup>a</sup> _TS-100-m15  | AGAAGGCTCCCGCTTTATTTTCGAACTTCATCAAATCAAAGTCAT<br>TAACATATTCCATAGC <u>G</u> AAGGGACTGGGAGG <u>GAA</u> AGCCATTCTG<br>GGACTGAGCAGA                          |
| Target 1 <sup>a</sup> _NTS-100-m17 | TCTGCTCAGTCCCAGAATGGCT <u>TTC</u> CCTCC <u>C</u> AGTCCCTTGG <u>G</u> TA<br><u>T</u> GGAATATGTTAATGACTTTGATTTGATGAAGTTCGAAATAAAG<br>CGGGAGCCTTCT          |

|                                           |                                                                                                                                        |
|-------------------------------------------|----------------------------------------------------------------------------------------------------------------------------------------|
| Target 1 <sup>a</sup> _TS-<br>100-m17     | AGAAGGCTCCCGCTTTATTTTCGAACTTCATCAAATCAAAGTCAT<br>TAACATATTCCATA <u>CCAAGGGACTGGGAGG</u> GAAAGCCATTCTG<br>GGACTGAGCAGA                  |
| Target 1 <sup>a</sup> _NTS-<br>100-m19    | TCTGCTCAGTCCCAGAATGGCT <u>TTC</u> CCTCCAGTCCCTTGGCT <u>T</u><br><u>T</u> GGAATATGTTAATGACTTTGATTTGATGAAGTTCGAAATAAAG<br>CGGGAGCCTTCT   |
| Target 1 <sup>a</sup> _TS-<br>100-m19     | AGAAGGCTCCCGCTTTATTTTCGAACTTCATCAAATCAAAGTCAT<br>TAACATATTCCA <u>A</u> AGCCAAGGGACTGGGAGG <u>GAA</u> AGCCATTCTG<br>GGACTGAGCAGA        |
| Target 1 <sup>a</sup> _NTS-<br>100-m1m2   | TCTGCTCAGTCCCAGAATGGCT <u>TTCGGT</u> CCAGTCCCTTGGCTA<br><u>T</u> GGAATATGTTAATGACTTTGATTTGATGAAGTTCGAAATAAAG<br>CGGGAGCCTTCT           |
| Target 1 <sup>a</sup> _TS-<br>100-m1m2    | AGAAGGCTCCCGCTTTATTTTCGAACTTCATCAAATCAAAGTCAT<br>TAACATATTCCATAGCCAAGGGACTGGGA <u>CCGAA</u> AGCCATTCTG<br>GGACTGAGCAGA                 |
| Target 1 <sup>a</sup> _NTS-<br>100-m3m4   | TCTGCTCAGTCCCAGAATGGCT <u>TTC</u> CCAGCCAGTCCCTTGGCTA<br><u>T</u> GGAATATGTTAATGACTTTGATTTGATGAAGTTCGAAATAAAG<br>CGGGAGCCTTCT          |
| Target 1 <sup>a</sup> _TS-<br>100-m3m4    | AGAAGGCTCCCGCTTTATTTTCGAACTTCATCAAATCAAAGTCAT<br>TAACATATTCCATAGCCAAGGGACTGG <u>CTGG</u> GAAAGCCATTCTG<br>GGACTGAGCAGA                 |
| Target 1 <sup>a</sup> _NTS-<br>100-m5m6   | TCTGCTCAGTCCCAGAATGGCT <u>TTC</u> CCTC <u>GG</u> AGTCCCTTGGCTA<br><u>T</u> GGAATATGTTAATGACTTTGATTTGATGAAGTTCGAAATAAAG<br>CGGGAGCCTTCT |
| Target 1 <sup>a</sup> _TS-<br>100-m5m6    | AGAAGGCTCCCGCTTTATTTTCGAACTTCATCAAATCAAAGTCAT<br>TAACATATTCCATAGCCAAGGGACT <u>CCGAGG</u> GAAAGCCATTCTG<br>GGACTGAGCAGA                 |
| Target 1 <sup>a</sup> _NTS-<br>100-m7m8   | TCTGCTCAGTCCCAGAATGGCT <u>TTC</u> CCTCC <u>TCT</u> CCTTGGCTA<br><u>T</u> GGAATATGTTAATGACTTTGATTTGATGAAGTTCGAAATAAAG<br>CGGGAGCCTTCT   |
| Target 1 <sup>a</sup> _TS-<br>100-m7m8    | AGAAGGCTCCCGCTTTATTTTCGAACTTCATCAAATCAAAGTCAT<br>TAACATATTCCATAGCCAAGGGAGAGGGAGG <u>GAA</u> AGCCATTCTG<br>GGACTGAGCAGA                 |
| Target 1 <sup>a</sup> _NTS-<br>100-m9m10  | TCTGCTCAGTCCCAGAATGGCT <u>TTC</u> CCTCCAGAGCCTTGGCTA<br><u>T</u> GGAATATGTTAATGACTTTGATTTGATGAAGTTCGAAATAAAG<br>CGGGAGCCTTCT           |
| Target 1 <sup>a</sup> _TS-<br>100-m9m10   | AGAAGGCTCCCGCTTTATTTTCGAACTTCATCAAATCAAAGTCAT<br>TAACATATTCCATAGCCAAGG <u>CTCT</u> GGGAGG <u>GAA</u> AGCCATTCTG<br>GGACTGAGCAGA        |
| Target 1 <sup>a</sup> _NTS-<br>100-m11m12 | TCTGCTCAGTCCCAGAATGGCT <u>TTC</u> CCTCCAGT <u>CGG</u> TTGGCTA<br><u>T</u> GGAATATGTTAATGACTTTGATTTGATGAAGTTCGAAATAAAG<br>CGGGAGCCTTCT  |

|                                       |                                                                                                                                            |
|---------------------------------------|--------------------------------------------------------------------------------------------------------------------------------------------|
| Target 1 <sup>a</sup> _TS-100-m11m12  | AGAAGGCTCCCGCTTTATTTTCGAACTTCATCAAATCAAAGTCAT<br>TAACATATTCCATAGCCAA <u>CCGACTGGGAGG</u> GAAAGCCATTCTG<br>GGACTGAGCAGA                     |
| Target 1 <sup>a</sup> _NTS-100-m13m14 | TCTGCTCAGTCCCAGAATGGCT <u>TTCCCTCCCAGTCCC</u> AAGGCTA<br>TGGAAATATGTTAATGACTTTGATTTGATGAAGTTCGAAATAAAG<br>CGGGAGCCTTCT                     |
| Target 1 <sup>a</sup> _TS-100-m13m14  | AGAAGGCTCCCGCTTTATTTTCGAACTTCATCAAATCAAAGTCAT<br>TAACATATTCCATAGCC <u>TTGGGACTGGGAGG</u> GAAAGCCATTCTG<br>GGACTGAGCAGA                     |
| Target 1 <sup>a</sup> _NTS-100-m15m16 | TCTGCTCAGTCCCAGAATGGCT <u>TTCCCTCCCAGTCCCTT</u> CCCTA<br>TGGAAATATGTTAATGACTTTGATTTGATGAAGTTCGAAATAAAG<br>CGGGAGCCTTCT                     |
| Target 1 <sup>a</sup> _TS-100-m15m16  | AGAAGGCTCCCGCTTTATTTTCGAACTTCATCAAATCAAAGTCAT<br>TAACATATTCCATAG <u>GG</u> AAGGGACTGGGAGG <u>GAA</u> AGCCATTCTG<br>GGACTGAGCAGA            |
| Target 1 <sup>a</sup> _NTS-100-m17m18 | TCTGCTCAGTCCCAGAATGGCT <u>TTCCCTCCCAGTCCCTT</u> GGGAA<br>TGGAAATATGTTAATGACTTTGATTTGATGAAGTTCGAAATAAAG<br>CGGGAGCCTTCT                     |
| Target 1 <sup>a</sup> _TS-100-m17m18  | AGAAGGCTCCCGCTTTATTTTCGAACTTCATCAAATCAAAGTCAT<br>TAACATATTCCAT <u>TCC</u> CAAGGGACTGGGAGG <u>GAA</u> AGCCATTCTG<br>GGACTGAGCAGA            |
| Target 1 <sup>a</sup> _NTS-100-m19m20 | TCTGCTCAGTCCCAGAATGGCT <u>TTCCCTCCCAGTCCCTT</u> GGCTT<br>AGGAATATGTTAATGACTTTGATTTGATGAAGTTCGAAATAAAG<br>CGGGAGCCTTCT                      |
| Target 1 <sup>a</sup> _TS-100-m19m20  | AGAAGGCTCCCGCTTTATTTTCGAACTTCATCAAATCAAAGTCAT<br>TAACATATTCC <u>TA</u> AGCCAAGGGACTGGGAGG <u>GAA</u> AGCCATTCTG<br>GGACTGAGCAGA            |
| CaMV_NTS-100                          | TCAACTTCTTCTGCTTCTTGGATAAGTCGCAGATTTTAGATAGT<br>TCTTCTTT <u>TTACT</u> ATCTTCGCCGCGAAACCTAAGCTGTAGATGCT<br>GGTTCGTTAGC                      |
| HPV16 site 1 <sup>b</sup> _NTS-100    | <u>CGCCAGGGTTTTCCAGT</u> CACGACTTTGGTGCTATGGACT <u>TTAC</u><br>TACATTACAGGCTAACAAAAGTGAAGTTCCAC <u>TCCTGTGTGAAA</u><br><u>TTGTTATCCGCT</u> |
| HPV18 site 1 <sup>b</sup> _NTS-100    | <u>CGCCAGGGTTTTCCAGT</u> CACGACTATGGTGCCATGGACT <u>TTAG</u><br>TACATTGCAAGATACTAAATGTGAGGTACCAT <u>TCCTGTGTGAAA</u><br><u>TTGTTATCCGCT</u> |
| HPV16 site 2 <sup>b</sup> _NTS-100    | GTCGTAGGTA CTCTTAAAGTTAGTATTTTTATATGTAGT <u>TTCT</u><br><u>GAAGTAGATATGGCAGCACATAATGACATATTTG</u> ACTGCGTGT<br>AGTATCAACAAC                |
| HPV18 site 2 <sup>b</sup> _NTS-100    | TACTGTGGTAGATACCACTCCCAGTACCAAT <u>TTAACA</u> ATATGTG<br><u>CTTCTACACAGTCTCCTGTACCTGGGCAATATGATGCTACCAA</u><br>TTTAAGCAGTAT                |

|                                        |                                                                                                                       |
|----------------------------------------|-----------------------------------------------------------------------------------------------------------------------|
| off-B101_NTS-100                       | CAGCGAGGTGGATTACCTGGTGTGCGTGGACGTGGACATGGAGT<br>TC <u>CGCGACCAC</u> GTGGGCGTGGAGATCCTGACTCCGCTGTTCGGC<br>ACCCTGCACCCC |
| on-B101_NTS-100                        | CAGCGAGGTGGATTACCTGGTGTGCGTGGACGTGGACATGGAGT<br>TC <u>CGCGACCAT</u> GTGGGCGTGGAGATCCTGACTCCGCTGTTCGGC<br>ACCCTGCACCCC |
| Off-001_NTS-100                        | GCAAACCTCACGTGGCGGCGCTTTGTGCTTGCAGGATGGTCTACC<br>CCCAGCCAAAGGTGCTGACACCGTGGTGAGTAAAGTTACTGACA<br>CTGAAACTGAAC         |
| ON-001_NTS-100                         | GCAAACCTCACGTGGCGGCGCTTTGCGCTTGCAGGATGGTCTACC<br>CCCAGCCAAAGGTGCTGACACCGTGGTGAGTAAAGTTACTGACA<br>CTGAAACTGAAC         |
| Off-002/03_NTS-100                     | G TTCAGTTTCAGTGT CAGTAACTTTACTCACCACGGTGT CAGCA<br>CCTTTGGCTGGGGGTAGACCATCCTGCAAGCACAAAGCGCCGCC<br>ACGTGAGTTTGC       |
| ON-002/03_NTS-100                      | G TTCAGTTTCAGTGT CAGTAACTTTACTCACCACGGTGT CAGCA<br>CCTTTGACTGGGGGTAGACCATCCTGCAAGCACAAAGCGCCGCC<br>ACGTGAGTTTGC       |
| BRCA1_3232WT_NTS-100                   | GTACAGTGAGCACAATTAGCCGTAATAACATTAGAGAAAATGTT<br>TTTAAGAGCCAGCTCAAGCAATATTAATGAAGTAGGTTCCAG<br>TACTAATGAAGT            |
| BRCA1_3232A>G_NTS-100                  | GTACAGTGAGCACAATTAGCCGTAATAACATTAGAGAAAATGTT<br>TTTAAGGAGCCAGCTCAAGCAATATTAATGAAGTAGGTTCCAG<br>TACTAATGAAGT           |
| BRCA1_3537WT_NTS-100                   | CAGATTTCTCTCCATATCTGATTT CAGATAACTTAGAACAGCCT<br>ATGGGAAGTAGTCATGCATCTCAGGTTTGTCTGAGACACCTGA<br>TGACCTGTTAGA          |
| BRCA1_3537A>G_NTS-100                  | CAGATTTCTCTCCATATCTGATTT CAGATAACTTAGAACAGCCT<br>ATGGGAAGTGGTCATGCATCTCAGGTTTGTCTGAGACACCTGA<br>TGACCTGTTAGA          |
| TP53_856WT_NTS                         | CTTTGAGGTGCGTGTTTGTGCCTGTCCTGGGAGAGACCGGCGCA<br>CAGAGGAAGAGAATCTCCGCAAGAAAGGGGAGCCTCACCACGAG<br>CTGCCCCAGG            |
| TP53_856G>A_NTS                        | CTTTGAGGTGCGTGTTTGTGCCTGTCCTGGGAGAGACCGGCGCA<br>CAGAGAAAGAGAATCTCCGCAAGAAAGGGGAGCCTCACCACGAG<br>CTGCCCCAGG            |
| dsActivator<br>1 <sup>b</sup> _NTS     | CGCCAGGGTTTTCCAGTCACGACTTTAGACCAGGATGGGCACC<br>ACCCTCCTGTGTGAAATTGTTATCCGCT                                           |
| dsActivator<br>2 <sup>b</sup> _NTS     | CGCCAGGGTTTTCCAGTCACGACTTTAGATCGTTACGCTAACT<br>ATGATCCTGTGTGAAATTGTTATCCGCT                                           |
| dsActivator<br>3 <sup>c</sup> _NTS-100 | CGCCAGGGTTTTCCAGTCACGACGTACCCGGGGATCCTTTAGA<br>GAAGTCATTTAATAAGGCCACTGTTAAAAAGCTCCTGTGTGAA<br>TTGTTATCCGCT            |

|                                       |                                                                                                               |
|---------------------------------------|---------------------------------------------------------------------------------------------------------------|
| DNMT1 site<br>1 <sup>d</sup> _NTS-100 | CGCCAGGGTTTTCCAGTCACGACCCCTGGGGCCGTTTCCTCA<br>CTCCTGCTCGGTGAATTTGGCTCAGCAGGCACTCCTGTGTGAAA<br>TTGTTATCCGCT    |
| DNMT1 site<br>2 <sup>d</sup> _NTS-100 | CGCCAGGGTTTTCCAGTCACGACTCTGGGGACCGTTTGAGGAG<br>TGTTTCAGTCTCCGTGAACGTTCCCTTAGCACTTCCTGTGTGAAA<br>TTGTTATCCGCT  |
| DNMT1 site<br>3 <sup>d</sup> _NTS-100 | CGCCAGGGTTTTCCAGTCACGACATCAGTACGTTAATGTTTC<br>TGATGGTCCATGTCTGTTACTCGCCTGTCAAGTCCTGTGTGAAA<br>TTGTTATCCGCT    |
| DNMT1 site<br>4 <sup>d</sup> _NTS-100 | CGCCAGGGTTTTCCAGTCACGACTGACTTTTCCTTTTATTTC<br>CTTCAGCTAAAATAAAGGAGGAGGAAGCTGCTTCCTGTGTGAAA<br>TTGTTATCCGCT    |
| EMX2 site<br>1 <sup>d</sup> _NTS-100  | CGCCAGGGTTTTCCAGTCACGACGCCGTTTGTACTTTGTCCTC<br>CGGTTCTGGAACCACACCTTCACCTGGGCCAGTCCTGTGTGAAA<br>TTGTTATCCGCT   |
| HERC2>A <sup>c</sup> _NTS-<br>100     | CGCCAGGGTTTTCCAGTCACGACAGAGGCGAGGCCAGTTTCAT<br>TTGAGCATTAAATGTCAAGTTCTGCACGCTATTCCTGTGTGAAA<br>TTGTTATCCGCT   |
| HERC2>G <sup>c</sup> _NTS-<br>100     | CGCCAGGGTTTTCCAGTCACGACAGAGGCGAGGCCAGTTTCAT<br>TTGAGCATTAAAGTGTCAAGTTCTGCACGCTATTCCTGTGTGAAA<br>TTGTTATCCGCT  |
| BRCA1_3232-<br>sgPOT-1                | CTGCTCCCCTCATGGCCCCACTTGCTCCTTCTGGACCACTTGAA<br>GGAACCAGCTCATGCTATTTTTTCATTCCCACCTTTATGTCATCT<br>TAGAAACATAGT |
| BRCA1_3232-<br>sgPOT-2                | ATCATGGGAAGTGCAGGAAGAGGTTCCCAGTAGAGGATCTTCAA<br>GGAGCCTGCACAAGCAACCAATGAAACAAAGAGCTAGTAATTGT<br>GCATCTGACATT  |
| BRCA1_3232-<br>sgPOT-3                | GATTTTTATGGAGGTTGACTTTGTGTGTGCATTGGAGTTTTGAA<br>GGTGCCATCTCAGGCAATTCACCCCCGAGGAGGGAAACATGGTT<br>CTCAGTGCAGCT  |
| BRCA1_3232-<br>sgPOT-4                | GTCTGTCTATAGGGGTTGGGGGAGAAAGAAAGAATTTATTTTAA<br>GGAATCAGCTCATGCAATAGTGGGGACTTGCAAGTCCGAAATCC<br>ATAGGCTGGTAT  |
| BRCA1_3232-<br>sgPOT-5                | AAGATAACAATGCCCATGAGTGTGGCAGGGTTCAGACTGTTTAA<br>GGAGCAAGCTCAAAGAATCTTCCCTCACTGGGTGGGGGCCGAGGA<br>GAATGGCAACCA |
| BRCA1_3232-<br>sgPOT-6/tgPOT-3        | TATTCACCTCATGTAGGTGCTGAATTTAATTGAGTTAGATTCTA<br>GGAGAAAGCTCAAGCAATGCCTAACCAAGGAAGCCGTGGATTCC<br>CATTTCAGAGCCA |
| BRCA1_3232-<br>sgPOT-7                | AAGAATTTTCAGCTGAATAACAACAAAAAAGTATTAGAAATTGAA<br>GGAGTCAGCTAAAGCAGTACTTAGAGAAAAATTTATAGCTTTAA<br>GTATTTATACTA |

|                                     |                                                                                                               |
|-------------------------------------|---------------------------------------------------------------------------------------------------------------|
| BRCA1_3232-<br>sgPOT-8              | TTACAGATGCTTCCTCAGCAACGGAAAGCCATAGCTAAGTTCAA<br>GGAGCCAGCCCACGCATTAGCATTTTCAGCAGAAATTCACAGGT<br>GACCAGTGTGTT  |
| BRCA1_3232-<br>sgPOT-9/tgPOT-4      | CTCACAAAGATTACAAACCACAAAAGGAAATAAAGCTTTTTGAA<br>GGAGTCAGCTAAAGCAATGGAGGAATGTATACCCCAAACTGAA<br>CATAGCAATCTC   |
| BRCA1_3232-<br>sgPOT-10/tgPOT-<br>5 | ATTTTGAAGTGAATGAAAATGAAAACGCCAGATCAAATTTGTA<br>GGAGACAGCTAAAGCAATGCTTGAGGAAATGTTCTGGCATTAAA<br>TGTTTTTTATAA   |
| BRCA1_3232-<br>sgPOT-11             | ACCCTGACTGATACAGATAACCTAGCCCAAGAGTCTGGATTCAA<br>TGTGCCAGCTCAAGCAGTTCTTAATGATTCTAACAGTTGCTCCA<br>CTATTAAACTAT  |
| BRCA1_3232-<br>sgPOT-12             | GCACCATATGGAAGTTATCAAGGCTTATAGCTTGCTTTCTTCAA<br>GGAGGCAGCTCAAGCTGTACCTGGACCCCTTGAACCACAGCTG<br>AACAGCTGGGAT   |
| BRCA1_3232-<br>sgPOT-13/tgPOT-<br>6 | GCAGCCGGGTTCTGCCCTCGTTCGGGGAAGTCTGCCAGGTTTCA<br>GGAGCCAGCTCAGGCACTTCGCCCCCTCCTCAGAGGCTGCCTCT<br>TGAGCCTTCAGT  |
| BRCA1_3232-<br>sgPOT-14             | CATATCATTGCTGAGTATTCCTTTGGAGATTCCTTCAATTGAA<br>GAAGCCACCTCATGCAATGTCATGTCTTATTCTCAAGAGCAGCT<br>CATGTCCAGTGA   |
| BRCA1_3232-<br>sgPOT-15             | TTCTAGTTGTTTTCTCTTTTGGAAATACATTAATGCTTCTTCAA<br>GGAGCCAGGCAAAGCAATCAGATCACTCACTGTAATCCTTATGA<br>GGAAGTGTATAT  |
| BRCA1_3232-<br>sgPOT-16             | AATATGCTGGAGATTTATGGGGACTATCTATGATTGTGGTTCAG<br>GGAGCCTGCTCAAGCAAACATAAATCTTGGTAAAAGAGTCAGTC<br>AAGCCATATAAA  |
| BRCA1_3232-<br>sgPOT-17             | ATGTCACAAACGTTGTGCAGTCCCTATGAGTTTCCCACATTGAA<br>TGAGCCAGCTTAAACAATATAAGCCTAAACTTCAAAGCTTGATA<br>AATACCCTTCGG  |
| BRCA1_3232-<br>sgPOT-18             | ACAATTGTTATAGGGAAGGCAAAATTCACCTCCATTCAATTTAG<br>GGATCCAGCTCAAGAAATAAATTTACATAAGATAGATTAATAAG<br>AATAAGAGCATA  |
| BRCA1_3232-<br>sgPOT-19             | GACCTAGCTCCTAGGATGCTTGAGGCTGAAGGAATGGTGTTTAA<br>GGAGAAATCTCAAGCAATGCCAAGTTCCAGTCAGGTAGAATTAG<br>AGTAGCTGAAAC  |
| BRCA1_3232-<br>sgPOT-20             | CTTAGGAAGCTCCAAGTTATAGAACCCTTCTCAAGGGGTGTTAAA<br>GGAGCCATCTGAAACAATAGGATGCTTCCTTAAGACAGGAGCCA<br>AGATCTTGGTAT |
| BRCA1_3232-<br>tgPOT-1              | GAAAGGTAAATGCTAGGAACAGGTGGCATCACCAGATACTTTTA<br>GGAGCCAGCTCACGTGATGTCTTGGCCTTTATGTTATAGGTAGG<br>TAAACAAACTAT  |

|                         |                                                                                                                |
|-------------------------|----------------------------------------------------------------------------------------------------------------|
| BRCA1_3232-<br>tgPOT-2  | CTTTTAGATAAAATGGAAATGAAGACAAACATACCAAATCTTATA<br>GGATGCAGCTTAAGCAATGTCTATGAGAATTTTTTTTTTAATTTT<br>ATTATTATTATA |
| BRCA1_3232-<br>tgPOT-7  | TTTGGAGCAAGTACCAAATGCCAAGCACTGTATTATGCATTCTA<br>GAAGCCATCTCATGCAATCCTCACAAAACCTCAAAAAGGTGGTG<br>TTTTACAGATGA   |
| BRCA1_3232-<br>tgPOT-8  | ATGATTGCCCGCCAAGATTTTCCTTTTTTTTTTTTTTTTTTTTTT<br>GGTACCAGCTCAAGCAATTCTCCTGCCTCAGCCTCCCAAGTAGC<br>TGAGATTACAGG  |
| BRCA1_3232-<br>tgPOT-9  | TGCGTTGGGCAAACACAAAGATGCTATTTGTAAAGCAAATTTTC<br>AGAGCCAGCTCAAGAAATGGAAAATACTCACCTAACTCGTGAGG<br>TGCTGTGATAA    |
| BRCA1_3232-<br>tgPOT-10 | AAAGCCTGGGAGTGATTAACAACCACTGCATAGCAAACCTTTTA<br>GGAGTCAGCTAAAGCACTATGGACAGGGAAATTTGTGGACTTAAA<br>AGCTCCTGTAAG  |
| BRCA1_3232-<br>tgPOT-11 | GAAAATTTCTGAAATGAATTTAAATGAGAATATCAAATTTGTA<br>GGATACAGCTAAAGCAATATTTTCAGAGAGAAATTCATAGTATTA<br>TATTAGTATTCA   |
| BRCA1_3232-<br>tgPOT-12 | GCTGCAGAGCCGGTGGTTTTCTATCACTACAGGTGGGGTTTTTA<br>GGAGCCACCTCCAGCAAGAAGCCACAAACCGGGCGTCCTTACCT<br>GACGCGGATGCA   |
| BRCA1_3232-<br>tgPOT-13 | CCTTTCAAAGAGTGCAATTTGCTATCACAAATGGTGCTTCTTTTA<br>GGACACAGCCCAAGCAATATTGCCTGCTTATTACCCCAAATGAA<br>ACATGAAGAATC  |
| BRCA1_3232-<br>tgPOT-14 | AATATTTTGAAGTGAATGAAAATGAAAAACTTCGAAATTTGTG<br>GGATGCAGCTCAAGCAATGCTTACAGGAAACCGACAGCATTAAA<br>TGCTTATATTAG    |
| BRCA1_3232-<br>tgPOT-15 | AAATTATTTTAACTGAATGATAATGAAAACATCAAATTTGTA<br>GGATGCAGCTAAAGCAATGTTAGAGGAAATATATAGCCTTATAT<br>GTATATTTTAGA     |
| BRCA1_3232-<br>tgPOT-16 | TTTTGAATTAATAAAAATGATACACAGCTTATCAAAGTTGTA<br>GGATGCAGCTAAAGCAATACTTAGAGGGAATTTATAGTTTGAAA<br>TGCTTATTTAGA     |
| BRCA1_3232-<br>tgPOT-17 | TTTTGTTTGAGTGATAATAAATATATTGTATGTCACAACCTGTG<br>GGAGGCAGCTCAAACAATACTTAGAAGAAAAATATATAGTGTAA<br>ATGCATATATTC   |
| BRCA1_3232-<br>tgPOT-18 | TCTCTCTCTTTCTTTCCAAGAGCCAATTTCTACCTATATTTTA<br>GGATCCAGCTCAAGCATCACCTCCTCCACAAAGCTTTTTCTAAC<br>CCCCTCATCAGC    |
| BRCA1_3232-<br>tgPOT-19 | GGTTAGCTGGATTTGTCCGTATTGCAGATGAGAGGGAGTTTTTA<br>GGACCCAGTTCCAGCAATTTTTCCTCCTCTGCACAGGTGCCATG<br>CATCACCTTTTC   |



|                          |                                                                                                               |
|--------------------------|---------------------------------------------------------------------------------------------------------------|
| BRCA1_3232-tgPOT-20      | TAATGCATAACTTCATTTAAAAAGTTTTGAAAATATAGTTTCTT<br>GGAGCTAGCTCAAGCATTAAATTGCACAGATTGTTAAAATAGTCT<br>GTATGCTATGGA |
| BRCA1_3232-tgPOT-21      | CATTTTGTCTGAATAAAAAGAAGACTACATATCAAATTTGTA<br>GGATGCAGCTAAAGCAATGCTTAGAGGGGAATTTATAGTTTAA<br>ACACATGTTAAA     |
| BRCA1_3232-tgPOT-22      | TCGAACATAACCAAGAGTAGAGAGAACCATAACAATAAACTTTTG<br>TGAGCCAGCTCCAGCAATTATCCATGTTGCCATCCTGTTTCATG<br>TATCCCTCCCCT |
| BRCA1_3232-tgPOT-23      | TATATTGAACTGAAAGAAAAGGAAAATACAACATAACATTTATA<br>GGATACAGCTAAAGCAATGTGGCAAGAGAAAATTTACAGCACCAA<br>ATGCTTAGATCA |
| TP53_856-sgPOT-1/tgPOT-1 | AAAGTTATTTGGAATATTTCTGCTCGACAGGTCCAATATTTTTC<br>TTCTCTGTGTGCCGGTCATAAGGAAATCTTCAGGACGCCAGTG<br>ATGCCAGCTAAA   |
| TP53_856-sgPOT-2         | GAGGAGTTTGACTTTAGCATTAGCACATGAGCAAGCGTATTCTC<br>TTTCTCTGTGCATCTGTCTAATAAAACAATAGGAATATAGCACA<br>AGTAAACTCTAT  |
| TP53_856-sgPOT-3         | TGGCTCCCCTCTGTCCATCTGCAAGACAGACAGCTCTGGTTCTC<br>TTTCTCTGGGCGCCAGTGCACCCCCAAGCCATGTCAAGCTGAGC<br>CCAGGAGTGCCT  |
| TP53_856-sgPOT-4/tgPOT-4 | GCACCTCCACGGCACTCCCAACTTTTTGTCCCCAGACGTTTGC<br>CTTCTCTGTGCGCTGGTCAGACGGCAGCGACACCTTCGTGCGCA<br>GGAGTTGGGACG   |
| TP53_856-sgPOT-5         | TGGAACTTGCCAACAGATTTTTGCTTTTTGTATCTGCCCTTCTC<br>TTTCTCTGTCTGCTGGTCTTTCCCTGCCTCTGCCAGCTGCCAT<br>GCTGCTATTTTC   |
| TP53_856-sgPOT-6         | CAGCCAAAACAGCAGTTCATTTGGGCATGTTTTCAATTTTCTA<br>TTTCTCTGGGCACCGGTCCCCATGGCCAGGTCAAGCTGTTCAAC<br>GCTCACACCAGC   |
| TP53_856-sgPOT-7         | GTTTATTTCTGGGTTTTATATTTGATTCTACTGATCTACTTGTC<br>TTTCTCTGTGCCACGGCCTCACTATTCTAATTTTAATTGCTTTA<br>TTATAAGTCTTA  |
| TP53_856-sgPOT-8         | ATCTTAGGACTCACAGTCTCCGGGCCTTTCTCTTCATCATTCTC<br>TTTCTCTGTGCTCCCCTCTGTCTGGGTTTCAATCTCAGAACGAT<br>TACTTGTTTTCT  |
| TP53_856-sgPOT-9         | GAACTCCACATGAGATCACAGGTGCAGGATTAGGGAAGCTTCTC<br>TTTTTCTGGGCCCCGGTCCATGCTAGCGGGTTTCAGTCACTTG<br>TCAATGGGTCCA   |
| TP53_856-sgPOT-10        | GAACTCCACATGAGACCACAGGTGCAGGATTAGGGAAGCTTCTC<br>TTTTTCTGGGCCCCGGTCCATGCTAGCAGGGTTTCAGTCACTTG<br>TCAATGGGTCCA  |

|                         |                                                                                                                                                       |
|-------------------------|-------------------------------------------------------------------------------------------------------------------------------------------------------|
| TP53_856-tgPOT-2        | CTGTAGAGA ACTAATGTAGTCTACACTGTACACTTGATGTT CAG<br>TTTCTCTGTGCAGCGGTC ACTTGTGAATTTTCAGGAGCCTTGCA<br>CAGTGAAGTAAC                                       |
| TP53_856-tgPOT-3        | CAACCCAACAGATTAGTTTGAAAACAATGTACGCCTATGTTTAC<br>TTTCTCTGTCCGCCTCTCCCTCAGGACCAGGTGCCTAGCTGACT<br>TAGCACATTCTC                                          |
| T7-AasgRNA-M13mp18      | <u>TAATACGACTCACTATAGGG</u> GTCTAAAGGACAGAATTTTTCAACG<br>GGTGTGCCAATGGCCACTTTCCAGGTGGCAAAGCCCGTTGAACT<br>TCAAGCGAAGTGGCAGC <u>ATCGTTACGCTAACTATGA</u> |
| T7-AasgRNA-Target 1     | <u>TAATACGACTCACTATAGGG</u> GTCTAAAGGACAGAATTTTTCAACG<br>GGTGTGCCAATGGCCACTTTCCAGGTGGCAAAGCCCGTTGAACT<br>TCAAGCGAAGTGGCACCCTCCAGTCCCTTGGCTAT          |
| T7-AasgRNA-Target 2     | <u>TAATACGACTCACTATAGGG</u> GTCTAAAGGACAGAATTTTTCAACG<br>GGTGTGCCAATGGCCACTTTCCAGGTGGCAAAGCCCGTTGAACT<br>TCAAGCGAAGTGGCACTGGAGAGGAATGGCTTCAGT         |
| T7-AasgRNA-HPV16_site_1 | <u>TAATACGACTCACTATAGGG</u> GTCTAAAGGACAGAATTTTTCAACG<br>GGTGTGCCAATGGCCACTTTCCAGGTGGCAAAGCCCGTTGAACT<br>TCAAGCGAAGTGGCACCTACATTACAGGCTAACAAA         |
| T7-AasgRNA-HPV18_site_1 | <u>TAATACGACTCACTATAGGG</u> GTCTAAAGGACAGAATTTTTCAACG<br>GGTGTGCCAATGGCCACTTTCCAGGTGGCAAAGCCCGTTGAACT<br>TCAAGCGAAGTGGCACGTACATTGCAAGATACTAAA         |
| T7-AasgRNA-HPV16_site_2 | <u>TAATACGACTCACTATAGGG</u> GTCTAAAGGACAGAATTTTTCAACG<br>GGTGTGCCAATGGCCACTTTCCAGGTGGCAAAGCCCGTTGAACT<br>TCAAGCGAAGTGGCACTGAAGTAGATATGGCAGCAC         |
| T7-AasgRNA-HPV18_site_2 | <u>TAATACGACTCACTATAGGG</u> GTCTAAAGGACAGAATTTTTCAACG<br>GGTGTGCCAATGGCCACTTTCCAGGTGGCAAAGCCCGTTGAACT<br>TCAAGCGAAGTGGCACACAATATGTGCTTCTACACA         |
| T7-AasgRNA-CaMV         | <u>TAATACGACTCACTATAGGG</u> GTCTAAAGGACAGAATTTTTCAACG<br>GGTGTGCCAATGGCCACTTTCCAGGTGGCAAAGCCCGTTGAACT<br>TCAAGCGAAGTGGCACCTATCTTCGCCGCGAAACCT         |
| T7-AasgRNA-B101         | <u>TAATACGACTCACTATAGGG</u> GTCTAAAGGACAGAATTTTTCAACG<br>GGTGTGCCAATGGCCACTTTCCAGGTGGCAAAGCCCGTTGAACT<br>TCAAGCGAAGTGGCACCCGCGACCATGTGGGCGTGGA        |
| T7-AatgRNA-B101         | <u>TAATACGACTCACTATAGGG</u> GTCTAAAGGACAGAATTTTTCAACG<br>GGTGTGCCAATGGCCACTTTCCAGGTGGCAAAGCCCGTTGAACT<br>TCAAGCGAAGTGGCACCCGCGACCATATGGGCGTGGA        |
| T7-AasgRNA-001          | <u>TAATACGACTCACTATAGGG</u> GTCTAAAGGACAGAATTTTTCAACG<br>GGTGTGCCAATGGCCACTTTCCAGGTGGCAAAGCCCGTTGAACT<br>TCAAGCGAAGTGGCACCGCTTGCAGGATGGTCTACC         |
| T7-AatgRNA-001          | <u>TAATACGACTCACTATAGGG</u> GTCTAAAGGACAGAATTTTTCAACG<br>GGTGTGCCAATGGCCACTTTCCAGGTGGCAAAGCCCGTTGAACT<br>TCAAGCGAAGTGGCACCACTTGCAGGATGGTCTACC         |

|                         |                                                                                                                                      |
|-------------------------|--------------------------------------------------------------------------------------------------------------------------------------|
| T7-AasgRNA-002/03       | TAATACGACTCACTATAGGGTCTAAAGGACAGAATTTTTCAACG<br>GGTGTGCCAATGGCCACTTTCCAGGTGGCAAAGCCCGTTGAACT<br>TCAAGCGAAGTGGCACACTGGGGGTAGACCATCCTG |
| T7-AatgRNA-002/03       | TAATACGACTCACTATAGGGTCTAAAGGACAGAATTTTTCAACG<br>GGTGTGCCAATGGCCACTTTCCAGGTGGCAAAGCCCGTTGAACT<br>TCAAGCGAAGTGGCACAATGGGGGTAGACCATCCTG |
| T7-AasgRNA-BRCA1_3232   | TAATACGACTCACTATAGGGTCTAAAGGACAGAATTTTTCAACG<br>GGTGTGCCAATGGCCACTTTCCAGGTGGCAAAGCCCGTTGAACT<br>TCAAGCGAAGTGGCACAAGGAGCCAGCTCAAGCAAT |
| T7-AatgRNA-BRCA1_3232-1 | TAATACGACTCACTATAGGGTCTAAAGGACAGAATTTTTCAACG<br>GGTGTGCCAATGGCCACTTTCCAGGTGGCAAAGCCCGTTGAACT<br>TCAAGCGAAGTGGCACTAGGAGCCAGCTCAAGCAAT |
| T7-AatgRNA-BRCA1_3232-2 | TAATACGACTCACTATAGGGTCTAAAGGACAGAATTTTTCAACG<br>GGTGTGCCAATGGCCACTTTCCAGGTGGCAAAGCCCGTTGAACT<br>TCAAGCGAAGTGGCACAAGGACCCAGCTCAAGCAAT |
| T7-AatgRNA-BRCA1_3232-3 | TAATACGACTCACTATAGGGTCTAAAGGACAGAATTTTTCAACG<br>GGTGTGCCAATGGCCACTTTCCAGGTGGCAAAGCCCGTTGAACT<br>TCAAGCGAAGTGGCACAAGGAGCCAGGTCAAGCAAT |
| T7-AatgRNA-BRCA1_3232-4 | TAATACGACTCACTATAGGGTCTAAAGGACAGAATTTTTCAACG<br>GGTGTGCCAATGGCCACTTTCCAGGTGGCAAAGCCCGTTGAACT<br>TCAAGCGAAGTGGCACAAGGAGCCAGCTCAACCAAT |
| T7-AasgRNA-BRCA1_3537   | TAATACGACTCACTATAGGGTCTAAAGGACAGAATTTTTCAACG<br>GGTGTGCCAATGGCCACTTTCCAGGTGGCAAAGCCCGTTGAACT<br>TCAAGCGAAGTGGCACGAACAGCCTATGGGAAGTGG |
| T7-AatgRNA-BRCA1_3537-1 | TAATACGACTCACTATAGGGTCTAAAGGACAGAATTTTTCAACG<br>GGTGTGCCAATGGCCACTTTCCAGGTGGCAAAGCCCGTTGAACT<br>TCAAGCGAAGTGGCACGAACAGCCTATGGGAAGTGG |
| T7-AatgRNA-BRCA1_3537-2 | TAATACGACTCACTATAGGGTCTAAAGGACAGAATTTTTCAACG<br>GGTGTGCCAATGGCCACTTTCCAGGTGGCAAAGCCCGTTGAACT<br>TCAAGCGAAGTGGCACCACAGCCTATGGGAAGTGG  |
| T7-AatgRNA-BRCA1_3537-3 | TAATACGACTCACTATAGGGTCTAAAGGACAGAATTTTTCAACG<br>GGTGTGCCAATGGCCACTTTCCAGGTGGCAAAGCCCGTTGAACT<br>TCAAGCGAAGTGGCACGAACACCCTATGGGAAGTGG |
| T7-AatgRNA-BRCA1_3537-4 | TAATACGACTCACTATAGGGTCTAAAGGACAGAATTTTTCAACG<br>GGTGTGCCAATGGCCACTTTCCAGGTGGCAAAGCCCGTTGAACT<br>TCAAGCGAAGTGGCACGAACAGCCTAAGGAAGTGG  |
| T7-AasgRNA-TP53_856     | TAATACGACTCACTATAGGGTCTAAAGGACAGAATTTTTCAACG<br>GGTGTGCCAATGGCCACTTTCCAGGTGGCAAAGCCCGTTGAACT<br>TCAAGCGAAGTGGCACTCTTCTCTGTGCGCCGTC   |
| T7-AatgRNA-TP53_856-1   | TAATACGACTCACTATAGGGTCTAAAGGACAGAATTTTTCAACG<br>GGTGTGCCAATGGCCACTTTCCAGGTGGCAAAGCCCGTTGAACT<br>TCAAGCGAAGTGGCACACTTCTCTGTGCGCCGTC   |

|                          |                                                                                                                                       |
|--------------------------|---------------------------------------------------------------------------------------------------------------------------------------|
| T7-AatgRNA-TP53_856-2    | TAATACGACTCACTATAGGGTCTAAAGGACAGAATTTTTCAACG<br>GGTGTGCCAATGGCCACTTTCCAGGTGGCAAAGCCCGTTGAACT<br>TCAAGCGAAGTGGCACTCTTTCTGTGTGCGCCGGTC  |
| T7-AatgRNA-TP53_856-3    | TAATACGACTCACTATAGGGTCTAAAGGACAGAATTTTTCAACG<br>GGTGTGCCAATGGCCACTTTCCAGGTGGCAAAGCCCGTTGAACT<br>TCAAGCGAAGTGGCACTCTTTCTCTGAGCGCCGGTC  |
| T7-AasgRNA-dsActivator-1 | TAATACGACTCACTATAGGGTCTAAAGGACAGAATTTTTCAACG<br>GGTGTGCCAATGGCCACTTTCCAGGTGGCAAAGCCCGTTGAACT<br>TCAAGCGAAGTGGCACGACCAGGATGGGCACCACCC  |
| T7-AasgRNA-dsActivator-2 | TAATACGACTCACTATAGGGTCTAAAGGACAGAATTTTTCAACG<br>GGTGTGCCAATGGCCACTTTCCAGGTGGCAAAGCCCGTTGAACT<br>TCAAGCGAAGTGGCACGATCGTTACGCTAACTATGA  |
| T7-AasgRNA-dsActivator-3 | TAATACGACTCACTATAGGGTCTAAAGGACAGAATTTTTCAACG<br>GGTGTGCCAATGGCCACTTTCCAGGTGGCAAAGCCCGTTGAACT<br>TCAAGCGAAGTGGCACGAGAAGTCATTTAATAAGGC  |
| T7-AasgRNA-DNMT1-1       | TAATACGACTCACTATAGGGTCTAAAGGACAGAATTTTTCAACG<br>GGTGTGCCAATGGCCACTTTCCAGGTGGCAAAGCCCGTTGAACT<br>TCAAGCGAAGTGGCACCTCACTCCTGCTCGGTGAA   |
| T7-AasgRNA-DNMT1-2       | TAATACGACTCACTATAGGGTCTAAAGGACAGAATTTTTCAACG<br>GGTGTGCCAATGGCCACTTTCCAGGTGGCAAAGCCCGTTGAACT<br>TCAAGCGAAGTGGCACAGGAGGTTTCAGTCTCCGTG  |
| T7-AasgRNA-DNMT1-3       | TAATACGACTCACTATAGGGTCTAAAGGACAGAATTTTTCAACG<br>GGTGTGCCAATGGCCACTTTCCAGGTGGCAAAGCCCGTTGAACT<br>TCAAGCGAAGTGGCACCTGATGGTCCATGTCTGTTA  |
| T7-AasgRNA-DNMT1-4       | TAATACGACTCACTATAGGGTCTAAAGGACAGAATTTTTCAACG<br>GGTGTGCCAATGGCCACTTTCCAGGTGGCAAAGCCCGTTGAACT<br>TCAAGCGAAGTGGCACTTTCCCTTCAGCTAAAATAA  |
| T7-AasgRNA-EMX1-2        | TAATACGACTCACTATAGGGTCTAAAGGACAGAATTTTTCAACG<br>GGTGTGCCAATGGCCACTTTCCAGGTGGCAAAGCCCGTTGAACT<br>TCAAGCGAAGTGGCACTCCTCCGGTTCTGGAACCAC  |
| T7-AasgRNA-HERC2A        | TAATACGACTCACTATAGGGTCTAAAGGACAGAATTTTTCAACG<br>GGTGTGCCAATGGCCACTTTCCAGGTGGCAAAGCCCGTTGAACT<br>TCAAGCGAAGTGGCACAGCATTAAATGTCAAGTTCT  |
| T7-AasgRNA-HERC2G        | TAATACGACTCACTATAGGGTCTAAAGGACAGAATTTTTCAACG<br>GGTGTGCCAATGGCCACTTTCCAGGTGGCAAAGCCCGTTGAACT<br>TCAAGCGAAGTGGCACAGCATTAAAGTGTCAAGTTCT |
| T7-crRNA-M13mp18-F       | TAATACGACTCACTATAGGATTTCTACTATTGTAGATGATCGTT<br>ACGCTAACTATGAGGG                                                                      |
| T7-crRNA-M13mp18-R       | CCCTCATAGTTAGCGTAACGATCATCTACAATAGTAGAAATCCT<br>ATAGTGAGTCGTATTA                                                                      |
| T7-crRNA-HPV16-2F        | TAATACGACTCACTATAGGATTTCTACTAAGTGTAGATTGAAGT<br>AGATATGGCAGCACGGG                                                                     |
| T7-crRNA-HPV16-2R        | CCCGTGCTGCCATATCTACTTCAATCTACACTTAGTAGAAATCC<br>TATAGTGAGTCGTATTA                                                                     |

|                         |                                                                                                                                      |
|-------------------------|--------------------------------------------------------------------------------------------------------------------------------------|
| T7-crRNA-HPV18-2F       | <u>TAATACGACTCACTATAGG</u> ATTTCTACTAAGTGTAGATACAATA<br>TGTGCTTCTACACAGGG                                                            |
| T7-crRNA-HPV18-2R       | CCCTGTGTAGAAGCACATATTGTATCTACACTTAGTAGAAATCC<br>TATAGTGAGTCGTATTA                                                                    |
| T7-sgRNA-M13mp18        | TAATACGACTCACTATAGGGTCTAAAGGACAGAATTTTTCAACG<br>GGTGTGCCAATGGCCACTTTCCAGGTGGCAAAGCCCGTTGAACT<br>TCAAGCGAAGTGGCACGATCGTTACGCTAACTATGA |
| T7-promoter-F           | TAATACGACTCACTATAGG                                                                                                                  |
| T7-crRNA-BRCA1_3232-R   | ATTGCTTGAGCTGGCTCCTTATCTACAATAGTAGAAATCCTATA<br>GTGAGTCGTATTA                                                                        |
| T7-crRNA-TP53_856-R     | GACCGGCGCACAGAGAAAGAATCTACAATAGTAGAAATCCTATA<br>GTGAGTCGTATTA                                                                        |
| T7-crRNA-HPV16-1R       | TTTGTTAGCCTGTAATGTAGATCTACAATAGTAGAAATCCTATA<br>GTGAGTCGTATTA                                                                        |
| T7-crRNA-HPV18-1R       | TTTAGTATCTTGCAATGTACATCTACAATAGTAGAAATCCTATA<br>GTGAGTCGTATTA                                                                        |
| T7-crRNA-dsActivator-1R | GGGTGGTGCCCATCCTGGTCATCTACAATAGTAGAAATCCTATA<br>GTGAGTCGTATTA                                                                        |
| T7-crRNA-dsActivator-2R | TCATAGTTAGCGTAACGATCATCTACAATAGTAGAAATCCTATA<br>GTGAGTCGTATTA                                                                        |
| T7-crRNA-dsActivator-3R | GCCTTATTAAATGACTTCTCATCTACAATAGTAGAAATCCTATA<br>GTGAGTCGTATTA                                                                        |
| T7-crRNA-DNMT1-1R       | TTCACCGAGCAGGAGTGAGGATCTACAATAGTAGAAATCCTATA<br>GTGAGTCGTATTA                                                                        |
| T7-crRNA-DNMT1-2R       | CACGGAGACTGAACACTCCTATCTACAATAGTAGAAATCCTATA<br>GTGAGTCGTATTA                                                                        |
| T7-crRNA-DNMT1-3R       | TAACAGACATGGACCATCAGATCTACAATAGTAGAAATCCTATA<br>GTGAGTCGTATTA                                                                        |
| T7-crRNA-DNMT1-4R       | TTATTTTAGCTGAAGGGAAAATCTACAATAGTAGAAATCCTATA<br>GTGAGTCGTATTA                                                                        |
| T7-crRNA-EMX1-2R        | GTGGTTCAGAACC GGAGGAATCTACAATAGTAGAAATCCTATA<br>GTGAGTCGTATTA                                                                        |
| T7-crRNA-HERC2G-R       | AGCATTAAATGTCAAGTTCTATCTACAATAGTAGAAATCCTATA<br>GTGAGTCGTATTA                                                                        |
| T7-crRNA-HERC2A-R       | AGAACTTGACACTTAATGCTATCTACAATAGTAGAAATCCTATA<br>GTGAGTCGTATTA                                                                        |
| <b>Primers</b>          |                                                                                                                                      |
| Target 1-F              | TCTGCTCAGTCCCAGAATGGC                                                                                                                |
| Target 1-R              | AGAAGGCTCCCGCTTTATTTTCG                                                                                                              |
| Target 2-F              | TAAGCCTATGGCTGAGGCTGC                                                                                                                |
| Target 2-R              | TCCGACTGTCACCTCAGTGGAG                                                                                                               |
| CaMV-F                  | GCTAACGGAACCAGCATCTACA                                                                                                               |
| CaMV-R                  | TCAACTTCTTCTGCTTCTTGG                                                                                                                |

|                       |                                                        |
|-----------------------|--------------------------------------------------------|
| T7-AasgRNA-HPV16-R    | <u>GTGCTGCCATATCTACTTCAGTGCCACTTCGCTTGAAGTTCA</u>      |
| T7-AasgRNA-HPV18-R    | <u>TGTGTAGAAGCACATATTGTGTGCCACTTCGCTTGAAGTTCA</u>      |
| HPV16_site_2-F        | GTTGTTGATACTACACGCAGTA                                 |
| HPV16_site_2-R        | GTCGTAGGTACTCCTTAAAGTT                                 |
| HPV18_site_2-F        | TACTGTGGTAGATACCACTCCC                                 |
| HPV18_site_2-R        | ATACTGCTTAAATTTGGTAGCA                                 |
| B101-F                | CAGCGAGGTGGATTACCTGGT                                  |
| B101-R                | GGGGTGCAGGGTGCCGAA                                     |
| O01/02/03-F           | GCAAACCTCACGTGGCGGC                                    |
| O01/02/03-R           | G TTCAGTTTCAGTGTCAGTAAC                                |
| BRCA1_3232-F          | GTACAGTGAGCACAATTAGCCG                                 |
| BRCA1_3232-R          | ACTTCATTAGTACTGGAACCTACTTC                             |
| BRCA1_3537-F          | CAGATTTCTCTCCATATCTGATTTTCAG                           |
| BRCA1_3537-R          | TCTAACAGGTCATCAGGTGTCTC                                |
| TP53_856-F            | CTTTGAGGTGCGTGTTCGTGC                                  |
| TP53_856-R            | CCTGGGGGCAGCTCGTGG                                     |
| M13F(-47)             | <u>CGCCAGGGTTTTCCAGTCACGAC</u>                         |
| M13R(-48)             | <u>AGCGGATAACAATTTACACAGGA</u>                         |
| T7-AasgRNA-F          | <u>TAATACGACTCACTATAGGGTCTAAAGGACAGAATTTTTCAACGGTG</u> |
| T7-AasgRNA-M13mp18-R  | <u>TCATAGTTAGCGTAACGATCGTGCCACTTCGCTTGAAGTTCA</u>      |
| T7-AasgRNA-Target 1-R | <u>ATAGCCAAGGGACTGGGAGGGTGCCACTTCGCTTGAAGTTCA</u>      |
| T7-AasgRNA-Target 2-R | <u>ACTGAAGCCATTCTCTCCAGTGCCACTTCGCTTGAAGTTCA</u>       |
| T7-AasgRNA-CaMV-R     | <u>AGGTTTCGCGGCGAAGATAGGTGCCACTTCGCTTGAAGTTCA</u>      |
| T7-AasgRNA-B101-R     | <u>TCCACGCCCACATGGTCGCGGTGCCACTTCGCTTGAAGTTCA</u>      |
| T7-AatgRNA-B101-R     | <u>TCCACGCCCATATGGTCGCGGTGCCACTTCGCTTGAAGTTCA</u>      |
| T7-AasgRNA-O01-R      | <u>GGTAGACCATCCTGCAAGCGGTGCCACTTCGCTTGAAGTTCA</u>      |
| T7-AatgRNA-O01-R      | <u>GGTAGACCATCCTGCAAGTGGTGCCACTTCGCTTGAAGTTCA</u>      |
| T7-AasgRNA-O02/03-R   | <u>CAGGATGGTCTACCCCCAGTGTGCCACTTCGCTTGAAGTTCA</u>      |
| T7-AatgRNA-O02/03-R   | <u>CAGGATGGTCTACCCCCATTGTGCCACTTCGCTTGAAGTTCA</u>      |

|                               |                                                    |
|-------------------------------|----------------------------------------------------|
| T7-AasgRNA-<br>BRCA1_3232-R   | <u>ATTGCTTGAGCTGGCTCCTTGTGCCACTTCGCTTGAAGTTCA</u>  |
| T7-AatgRNA-<br>BRCA1_3232-1-R | <u>ATTGCTTGAGCTGGCTCCTAGTGCCACTTCGCTTGAAGTTCA</u>  |
| T7-AatgRNA-<br>BRCA1_3232-2-R | <u>ATTGCTTGAGCTGGGTCCTTGTGCCACTTCGCTTGAAGTTCA</u>  |
| T7-AatgRNA-<br>BRCA1_3232-3-R | <u>ATTGCTTGACCTGGCTCCTTGTGCCACTTCGCTTGAAGTTCA</u>  |
| T7-AatgRNA-<br>BRCA1_3232-4-R | <u>ATTGGTTGAGCTGGCTCCTTGTGCCACTTCGCTTGAAGTTCA</u>  |
| T7-AasgRNA-<br>BRCA1_3537-R   | <u>CCACTTCCCATAGGCTGTTTCGTGCCACTTCGCTTGAAGTTCA</u> |
| T7-AatgRNA-<br>BRCA1_3537-1-R | <u>CCACTTCCCATAGGCTGTTGGTGCCACTTCGCTTGAAGTTCA</u>  |
| T7-AatgRNA-<br>BRCA1_3537-2-R | <u>CCACTTCCCATAGGCTGTTTCGTGCCACTTCGCTTGAAGTTCA</u> |
| T7-AatgRNA-<br>BRCA1_3537-3-R | <u>CCACTTCCCTTAGGCTGTTTCGTGCCACTTCGCTTGAAGTTCA</u> |
| T7-AatgRNA-<br>BRCA1_3537-4-R | <u>CCACATCCCATAGGCTGTTTCGTGCCACTTCGCTTGAAGTTCA</u> |
| T7-AasgRNA-<br>HPV16_site_1-R | <u>TTTGTTAGCCTGTAATGTAGGTGCCACTTCGCTTGAAGTTCA</u>  |
| T7-AasgRNA-<br>HPV18_site_1-R | <u>TTTAGTATCTTGCAATGTACGTGCCACTTCGCTTGAAGTTCA</u>  |
| T7-AasgRNA-<br>HPV16_site_2-R | <u>GTGCTGCCATATCTACTTCAGTGCCACTTCGCTTGAAGTTCA</u>  |
| T7-AasgRNA-<br>HPV18_site_2-R | <u>TGTGTAGAAGCACATATTGTGTGCCACTTCGCTTGAAGTTCA</u>  |
| T7-AasgRNA-<br>TP53_856-R     | <u>GACCGGCGCACAGAGAAAGAGTGCCACTTCGCTTGAAGTTC</u>   |
| T7-AatgRNA-<br>TP53_856-1-R   | <u>GACCGGCGCACAGAGAAATAGTGCCACTTCGCTTGAAGTTC</u>   |
| T7-AatgRNA-<br>TP53_856-2-R   | <u>GACCGGCGCACACAGAAAGAGTGCCACTTCGCTTGAAGTTC</u>   |
| T7-AatgRNA-<br>TP53_856-3-R   | <u>GACCGGCGCTCAGAGAAAGAGTGCCACTTCGCTTGAAGTTC</u>   |
| T7-AasgRNA-<br>target_1-R     | <u>GGGTGGTGCCATCCTGGTTCGTGCCACTTCGCTTGAAGTTCA</u>  |
| T7-AasgRNA-<br>target_2-R     | <u>TCATAGTTAGCGTAACGATCGTGCCACTTCGCTTGAAGTTCA</u>  |
| T7-AasgRNA-<br>target_3-R     | <u>TCAGCTGTGGAACACCCAGGGTGCCACTTCGCTTGAAGTTCA</u>  |
| T7-AasgRNA-<br>target_4-R:    | <u>GCCTTATTAAATGACTTCTCGTGCCACTTCGCTTGAAGTTCA</u>  |

|                              |                                                   |
|------------------------------|---------------------------------------------------|
| T7-AasgRNA-DNMT1_target_1-R: | <u>TTCACCGAGCAGGAGTGAGGGTGCCACTTCGCTTGAAGTTCA</u> |
| T7-AasgRNA-DNMT1_target_2-R  | <u>CACGGAGACTGAACACTCCTGTGCCACTTCGCTTGAAGTTCA</u> |
| T7-AasgRNA-DNMT1_target_3-R: | <u>TAACAGACATGGACCATCAGGTGCCACTTCGCTTGAAGTTCA</u> |
| T7-AasgRNA-DNMT1_target_4-R  | <u>TTATTTTAGCTGAAGGGAAAGTGCCACTTCGCTTGAAGTTCA</u> |
| T7-AasgRNA-EMX1_target_1-R   | <u>GGAGGGAGGGGCACAGATGAGTGCCACTTCGCTTGAAGTTCA</u> |
| T7-AasgRNA-EMX1_target_2-R   | <u>GTGGTTCCAGAACCGGAGGAGTGCCACTTCGCTTGAAGTTCA</u> |
| T7-AasgRNA-HERC2A-R:         | <u>AGAACTTGACATTTAATGCTGTGCCACTTCGCTTGAAGTTCA</u> |
| T7-AasgRNA-HERC2G-R:         | <u>AGAACTTGACACTTAATGCTGTGCCACTTCGCTTGAAGTTCA</u> |
| BRCA1_3232-sgPOT-1-F         | CTGCTCCCCTCATGGCCCCACTTGCTCCTT                    |
| BRCA1_3232-sgPOT-1-R         | ACTATGTTTCTAAGATGACATAAAGGTGGG                    |
| BRCA1_3232-sgPOT-2-F         | ATCATGGGAACTGCAGGAAGAGGTTCCCAG                    |
| BRCA1_3232-sgPOT-2-R         | AATGTCAGATGCACAATTACTAGCTCTTTG                    |
| BRCA1_3232-sgPOT-3-F         | GATTTTTATGGAGGTTGACTTTGTGTGTGC                    |
| BRCA1_3232-sgPOT-3-R         | AGCTGCACTGAGAACCATGTTTCCCTCCTC                    |
| BRCA1_3232-sgPOT-4-F         | GTCTGTCTATAGGGTTGGGGGAGAAAGAA                     |
| BRCA1_3232-sgPOT-4-R         | ATACCAGCCTATGGATTTCCGACTTGCAAG                    |
| BRCA1_3232-sgPOT-5-F         | AAGATAACAATGCCCATGAGTGTGGCAGGG                    |
| BRCA1_3232-sgPOT-5-R         | TGGTTGCCATTCTCCTCGGCCCCCACCAG                     |
| BRCA1_3232-sgPOT-6-F         | TATCACTTCATGTAGGTGCTGAATTTAAT                     |
| BRCA1_3232-sgPOT-6-R         | TGGCTCTGAATGGGAATCCACGGCTTCCTT                    |



|                           |                                 |
|---------------------------|---------------------------------|
| BRCA1_3232-<br>sgPOT-7-F  | AAGAATTTTCAGCTGAATAACAACAAAAAAG |
| BRCA1_3232-<br>sgPOT-7-R  | TAGTATAAATACTTAAAGCTATAAATTTTT  |
| BRCA1_3232-<br>sgPOT-8-F  | TTACAGATGCTTCCTCAGCAACGGAAAGCC  |
| BRCA1_3232-<br>sgPOT-8-R  | AACACACTGGTCACCTGTGGAATTTCTGCT  |
| BRCA1_3232-<br>sgPOT-9-F  | CTCACAAAGATTACAAACCACAAAAGGAAA  |
| BRCA1_3232-<br>sgPOT-9-R  | GAGATTGCTATGTTTCAGTTTTGGGGTATAC |
| BRCA1_3232-<br>sgPOT-10-F | ATTTTGAAGTGAATGAAAATGAAAACGCCA  |
| BRCA1_3232-<br>sgPOT-10-R | TTATAAAAACATTTAATGCCAGAACATTT   |
| BRCA1_3232-<br>sgPOT-11-F | ACCCTGACTGATACAGATAACCTAGCCCAA  |
| BRCA1_3232-<br>sgPOT-11-R | ATAGTTTAATAGTGGAGCAACTGTTAGAAT  |
| BRCA1_3232-<br>sgPOT-12-F | GCACCATATGGAAGTTATCAAGGCTTATAG  |
| BRCA1_3232-<br>sgPOT-12-R | ATCCCAGCTGTTTCAGCTGTGGTTCAAGGGG |
| BRCA1_3232-<br>sgPOT-13-F | GCAGCCGGGTTCTGCCCTCGTTCGGGGAAC  |
| BRCA1_3232-<br>sgPOT-13-R | ACTGAAGGCTCAAGAGGCAGCCTCTGAGGA  |
| BRCA1_3232-<br>sgPOT-14-F | CATATCATTGCTGAGTATTCCTTTGGAGAT  |
| BRCA1_3232-<br>sgPOT-14-R | TCACTGGACATGAGCTGCTCTTGAGAATAA  |
| BRCA1_3232-<br>sgPOT-15-F | TTCTAGTTGTTTTCTCTTTTGGAAATACAT  |
| BRCA1_3232-<br>sgPOT-15-R | ATATACACTTCCTCATAAGGATTACAGTGA  |
| BRCA1_3232-<br>sgPOT-17-F | AATATGCTGGAGATTTATGGGGACTATCTA  |
| BRCA1_3232-<br>sgPOT-17-R | TTTATATGGCTTGACTGACTCTTTTACCAA  |
| BRCA1_3232-<br>sgPOT-18-F | ATGTCACAAACGTTGTGCAGTCCCTATGAG  |
| BRCA1_3232-<br>sgPOT-18-R | CCGAAGGGTATTTATCAAGCTTTGAAGTTT  |

|                           |                                 |
|---------------------------|---------------------------------|
| BRCA1_3232-<br>sgPOT-19-F | ACAATTGTTATAGGGAAGGCAAAATTCCAC  |
| BRCA1_3232-<br>sgPOT-19-R | TATGCTCTTATTCATTTTAATCTATCTTAT  |
| BRCA1_3232-<br>sgPOT-20-F | GACCTAGCTCCTAGGATGCTTGAGGCTGAA  |
| BRCA1_3232-<br>sgPOT-20-R | GTTTCAGCTACTCTAATTCTACCTGACTGG  |
| BRCA1_3232-<br>sgPOT-21-F | CTTAGGAAGCTCCAAGTTATAGAACCTTCT  |
| BRCA1_3232-<br>sgPOT-21-R | ATACCAAGATCTTGGCTCCTGTCTTAAGGA  |
| BRCA1_3232-<br>tgPOT-1-F  | GAAAGGTAAATGCTAGGAACAGGTGGCATC  |
| BRCA1_3232-<br>tgPOT-1-R  | ATAGTTTGTTCCTACCTATAACATAAAG    |
| BRCA1_3232-<br>tgPOT-2-F  | CTTTTAGATAAAATGGAAATGAAGACAAACA |
| BRCA1_3232-<br>tgPOT-2-R  | TATAATAATAATAAAATTAATAAATAATTC  |
| BRCA1_3232-<br>tgPOT-7-F  | TTTGGAGCAAGTACCAAATGCCAAGCACTG  |
| BRCA1_3232-<br>tgPOT-7-R  | TCATCTGTAAAACACCACCTTTTTGAGTTT  |
| BRCA1_3232-<br>tgPOT-8-F  | ATGATTGCCCGCCAAGATTTTCCTTTTTTTT |
| BRCA1_3232-<br>tgPOT-8-R  | CCTGTAATCTCAGCTACTTGGGAGGCTGAG  |
| BRCA1_3232-<br>tgPOT-9-F  | TGCGTTGGGCAAACACAAAGATGCTATTTG  |
| BRCA1_3232-<br>tgPOT-9-R  | TTATCACAGGCACCTCACGAGTTAGGTGAG  |
| BRCA1_3232-<br>tgPOT-10-F | AAAGCCTGGGAGTGATTAACAACCACTGCA  |
| BRCA1_3232-<br>tgPOT-10-R | CTTACAGGAGCTTTTAAGTCCACAATTTCC  |
| BRCA1_3232-<br>tgPOT-11-F | GAAAATTTCTGAAATGAATTAATAATGAGAA |
| BRCA1_3232-<br>tgPOT-11-R | TGAATACTAATATAATACTATGAATTTCTC  |
| BRCA1_3232-<br>tgPOT-12-F | GCTGCAGAGCCGGTGGTTTTTCTATCACTA  |
| BRCA1_3232-<br>tgPOT-12-R | TGCATCCGCGTCAGGTAAGGACGCCCGGTT  |

|                           |                                 |
|---------------------------|---------------------------------|
| BRCA1_3232-<br>tgPOT-13-F | CCTTTCAAAGAGTGCATTTGCTATCACAAA  |
| BRCA1_3232-<br>tgPOT-13-R | GATTCTTCATGTTTCATTTGGGGTAATAAG  |
| BRCA1_3232-<br>tgPOT-14-F | AATATTTTGAAGTGAATGAAAATGAAAAA   |
| BRCA1_3232-<br>tgPOT-14-R | CTAATATAAGCATTTAATGCTGTGCGTTTC  |
| BRCA1_3232-<br>tgPOT-15-F | AAATTATTTTAACCTGAATGATAATGAAAA  |
| BRCA1_3232-<br>tgPOT-15-R | TCTAAAATATACATATAAGGCTATATATTT  |
| BRCA1_3232-<br>tgPOT-16-F | TTTTGAATTAATAAAAATGATACACAGCT   |
| BRCA1_3232-<br>tgPOT-16-R | TCTAAATAAGCATTTCAAACTATAAATTCC  |
| BRCA1_3232-<br>tgPOT-18-F | TTTTGTTTGAGTGATAATAAATATATTGTA  |
| BRCA1_3232-<br>tgPOT-18-R | GAATATATGCATTTAACACTATATATTTTC  |
| BRCA1_3232-<br>tgPOT-19-F | TCTCTCTCTTTCTTTCCAAGAGGCCAATTT  |
| BRCA1_3232-<br>tgPOT-19-R | GCTGATGAGGGGGTTAGAAAAAGCTTTGTG  |
| BRCA1_3232-<br>tgPOT-20-F | GGTTAGCTGGATTTGTCCGTATTGCAGATG  |
| BRCA1_3232-<br>tgPOT-20-R | GAAAAGGTGATGCATGGCACCTGTGCAGAG  |
| BRCA1_3232-<br>tgPOT-21-F | TAATGCATAACTTCATTTAAAAAGTTTTGA  |
| BRCA1_3232-<br>tgPOT-21-R | TCCATAGCATAACAGACTATTTTAACAATCT |
| BRCA1_3232-<br>tgPOT-22-F | CATTTTGTTCTGAATAAAAAGAAGACTACA  |
| BRCA1_3232-<br>tgPOT-22-R | TTTAACATGTGTTTAAACTATAAATTCCC   |
| BRCA1_3232-<br>tgPOT-23-F | TCGAACATACCCAAGAGTAGAGAGAACCAT  |
| BRCA1_3232-<br>tgPOT-23-R | AGGGGAGGGATACATGAAACAGGATGGCAA  |
| BRCA1_3232-<br>tgPOT-24-F | TATATTGAACTGAAAGAAAAGGAAAATACA  |
| BRCA1_3232-<br>tgPOT-24-R | TGATCTAAGCATTTGTTGCTGTAAATTTCT  |

|                     |                                   |
|---------------------|-----------------------------------|
| TP53_856-sgPOT-1-F  | AAAGTTATTTGGAATATTTCTGCTCGACAG    |
| TP53_856-sgPOT-1-R  | TTTAGCTGGCATCACTGGCGTCCTGAAGAT    |
| TP53_856-sgPOT-2-F  | GAGGAGTTTGACTIONTTAGCATTAGCACATGA |
| TP53_856-sgPOT-2-R  | ATAGAGTTTACTTGTGCTATATTCCTATTG    |
| TP53_856-sgPOT-3-F  | TGGCTCCCCTCTGTCCATCTGCAAGACAGA    |
| TP53_856-sgPOT-3-R  | AGGCACTCCTGGGCTCAGCTTGACATGGCT    |
| TP53_856-sgPOT-4-F  | GCACCTCCACGGCACTCCCAACTTTTTGTC    |
| TP53_856-sgPOT-4-R  | CGTCCCAACTCCTGCGCACGAAGGTGTTCG    |
| TP53_856-sgPOT-5-F  | TGGAACCTGCCAACAGATTTTTGCTTTTTG    |
| TP53_856-sgPOT-5-R  | GAAAATAGCAGCATGGGCAGCTGGCAGAGG    |
| TP53_856-sgPOT-6-F  | CAGCCAAAACAGCAGTTCATTTGGGCATG     |
| TP53_856-sgPOT-6-R  | GCTGGTGTGAGCGTTGAACAGCTTGACCTG    |
| TP53_856-sgPOT-7-F  | GTTTATTTCTGGGTTTTATATTTGATTCTA    |
| TP53_856-sgPOT-7-R  | TAAGACTTATAATAAAGCAATTAAAATTAG    |
| TP53_856-sgPOT-9-F  | ATCTTAGGACTCACAGTCTCCGGGCCTTTC    |
| TP53_856-sgPOT-9-R  | AGAAAACAAGTAATCGTTCTGAGATTGAAA    |
| TP53_856-sgPOT-10-F | GAACTCCACATGAGATCACAGGTGCAGGAT    |
| TP53_856-sgPOT-10-R | TGGACCCATTGACAAGTGACTIONGAAACCCCG |
| TP53_856-sgPOT-11-F | GAACTCCACATGAGACCACAGGTGCAGGAT    |
| TP53_856-sgPOT-11-R | TGGACCCATTGACAAGTGACTIONGAAACCCTG |
| TP53_856-tgPOT-2-F  | CTGTAGAGAACTAATGTAGTCTACACTGTA    |
| TP53_856-tgPOT-2-R  | GTTACTTCACTIONGTGCAAGGCTCCTGAAAAT |

|                      |                                                                                                                           |
|----------------------|---------------------------------------------------------------------------------------------------------------------------|
| TP53_856-tgPOT-3-F   | CAACCCAACAGATTAGTTTGAAAACAATGT                                                                                            |
| TP53_856-tgPOT-3-R   | GAGAATGTGCTAAGTCAGCTAGGCACCTGG                                                                                            |
| RPA-BRCA1_3232-F-1   | GTACAGTGAGCACAAATTAGCCGTAATAACA                                                                                           |
| RPA-BRCA1_3232-R-1   | ACTTCATTAGTACTGGAACCTACTTCATTA                                                                                            |
| RPA-TP53_856-F       | CTTTGAGGTGCGTGTTTGTGCCTGTCCTGG                                                                                            |
| RPA-TP53_856-R       | CCTGGGGGCAGCTCGTGGTGAGGCTCCCCT                                                                                            |
| RPA-BRCA1_3232-F-2   | ACATTCCAAGTACAGTGAGCACAAATTAGCC                                                                                           |
| RPA-BRCA1_3232-R-2   | ATTTTGGCCCTCTGTTTCTACCTAGTTCTG                                                                                            |
| <b>RNA</b>           |                                                                                                                           |
| AasgRNA-M13mp18      | GUCUAAAGGACAGAAUUUUUCAACGGGUGUGCCAAUGGCCACUU<br>UCCAGGUGGCAAAGCCCCGUUGAACUUCAAGCGAAGUGGCACGAU<br><u>CGUUACGCUAACUAUGA</u> |
| AasgRNA-Target 1     | GUCUAAAGGACAGAAUUUUUCAACGGGUGUGCCAAUGGCCACUU<br>UCCAGGUGGCAAAGCCCCGUUGAACUUCAAGCGAAGUGGCACCCU<br><u>CCCAGUCCCUUGGCUAU</u> |
| AasgRNA-Target 2     | GUCUAAAGGACAGAAUUUUUCAACGGGUGUGCCAAUGGCCACUU<br>UCCAGGUGGCAAAGCCCCGUUGAACUUCAAGCGAAGUGGCACUGG<br><u>AGAGGAAUGGCUUCAGU</u> |
| AasgRNA-CaMV         | GUCUAAAGGACAGAAUUUUUCAACGGGUGUGCCAAUGGCCACUU<br>UCCAGGUGGCAAAGCCCCGUUGAACUUCAAGCGAAGUGGCACCUA<br><u>UCUUCGCCGCGAAACCU</u> |
| AasgRNA-HPV16_site_2 | GUCUAAAGGACAGAAUUUUUCAACGGGUGUGCCAAUGGCCACUU<br>UCCAGGUGGCAAAGCCCCGUUGAACUUCAAGCGAAGUGGCACUGA<br><u>AGUAGUAUGGCAGCAC</u>  |
| AasgRNA-HPV18_site_2 | GUCUAAAGGACAGAAUUUUUCAACGGGUGUGCCAAUGGCCACUU<br>UCCAGGUGGCAAAGCCCCGUUGAACUUCAAGCGAAGUGGCACACA<br><u>AUAUGUGCUUCUACACA</u> |
| AasgRNA-B101         | GUCUAAAGGACAGAAUUUUUCAACGGGUGUGCCAAUGGCCACUU<br>UCCAGGUGGCAAAGCCCCGUUGAACUUCAAGCGAAGUGGCACCGC<br><u>GACCAUGUGGGCGUGGA</u> |
| AatgRNA-B101         | GUCUAAAGGACAGAAUUUUUCAACGGGUGUGCCAAUGGCCACUU<br>UCCAGGUGGCAAAGCCCCGUUGAACUUCAAGCGAAGUGGCACCGC<br><u>GACCAUAUGGGCGUGGA</u> |
| AasgRNA-001          | GUCUAAAGGACAGAAUUUUUCAACGGGUGUGCCAAUGGCCACUU<br>UCCAGGUGGCAAAGCCCCGUUGAACUUCAAGCGAAGUGGCACCGC<br><u>UUGCAGGAUGGUCUACC</u> |

|                          |                                                                                                                                     |
|--------------------------|-------------------------------------------------------------------------------------------------------------------------------------|
| AatgRNA-001              | GUCUAAAGGACAGAAUUUUUCAACGGGUGUGCCAAUGGCCACUU<br>UCCAGGUGGCAAAGCCCCGUUGAACUUCAAGCGAAGUGGCACC <u>AC</u><br>UUGCAGGAUGGUCUACC          |
| AasgRNA-002/03           | GUCUAAAGGACAGAAUUUUUCAACGGGUGUGCCAAUGGCCACUU<br>UCCAGGUGGCAAAGCCCCGUUGAACUUCAAGCGAAGUGGCAC <u>ACU</u><br>GGGGGUAGACCAUCCUG          |
| AatgRNA-002/03           | GUCUAAAGGACAGAAUUUUUCAACGGGUGUGCCAAUGGCCACUU<br>UCCAGGUGGCAAAGCCCCGUUGAACUUCAAGCGAAGUGGCACA <u>AU</u><br>GGGGGUAGACCAUCCUG          |
| AasgRNA-<br>BRCA1_3232   | GUCUAAAGGACAGAAUUUUUCAACGGGUGUGCCAAUGGCCACUU<br>UCCAGGUGGCAAAGCCCCGUUGAACUUCAAGCGAAGUGGCACA <u>AG</u><br>GAGCCAGCUCAAGCAAU          |
| AatgRNA-<br>BRCA1_3232-1 | GUCUAAAGGACAGAAUUUUUCAACGGGUGUGCCAAUGGCCACUU<br>UCCAGGUGGCAAAGCCCCGUUGAACUUCAAGCGAAGUGGCAC <u>UAG</u><br>GAGCCAGCUCAAGCAAU          |
| AatgRNA-<br>BRCA1_3232-2 | GUCUAAAGGACAGAAUUUUUCAACGGGUGUGCCAAUGGCCACUU<br>UCCAGGUGGCAAAGCCCCGUUGAACUUCAAGCGAAGUGGCACA <u>AG</u><br>GACCAGCUCAAGCAAU           |
| AatgRNA-<br>BRCA1_3232-3 | GUCUAAAGGACAGAAUUUUUCAACGGGUGUGCCAAUGGCCACUU<br>UCCAGGUGGCAAAGCCCCGUUGAACUUCAAGCGAAGUGGCACA <u>AG</u><br>GAGCCAG <u>G</u> UCAAGCAAU |
| AatgRNA-<br>BRCA1_3232-4 | GUCUAAAGGACAGAAUUUUUCAACGGGUGUGCCAAUGGCCACUU<br>UCCAGGUGGCAAAGCCCCGUUGAACUUCAAGCGAAGUGGCACA <u>AG</u><br>GAGCCAGCUCA <u>C</u> CAAU  |
| AasgRNA-<br>BRCA1_3537   | GUCUAAAGGACAGAAUUUUUCAACGGGUGUGCCAAUGGCCACUU<br>UCCAGGUGGCAAAGCCCCGUUGAACUUCAAGCGAAGUGGCAC <u>GAA</u><br>CAGCCUAUGGGAAGUGG          |
| AatgRNA-<br>BRCA1_3537-1 | GUCUAAAGGACAGAAUUUUUCAACGGGUGUGCCAAUGGCCACUU<br>UCCAGGUGGCAAAGCCCCGUUGAACUUCAAGCGAAGUGGCAC <u>CAA</u><br>CAGCCUAUGGGAAGUGG          |
| AatgRNA-<br>BRCA1_3537-2 | GUCUAAAGGACAGAAUUUUUCAACGGGUGUGCCAAUGGCCACUU<br>UCCAGGUGGCAAAGCCCCGUUGAACUUCAAGCGAAGUGGCAC <u>GAA</u><br>CA <u>CC</u> UAUGGGAAGUGG  |
| AatgRNA-<br>BRCA1_3537-3 | GUCUAAAGGACAGAAUUUUUCAACGGGUGUGCCAAUGGCCACUU<br>UCCAGGUGGCAAAGCCCCGUUGAACUUCAAGCGAAGUGGCAC <u>GAA</u><br>CAGCCUA <u>AG</u> GGAAGUGG |
| AatgRNA-<br>BRCA1_3537-4 | GUCUAAAGGACAGAAUUUUUCAACGGGUGUGCCAAUGGCCACUU<br>UCCAGGUGGCAAAGCCCCGUUGAACUUCAAGCGAAGUGGCAC <u>GAA</u><br>CAGCCUAUGGGA <u>U</u> GUGG |
| crRNA-M13mp18            | AUUUCUACUAUUGUAGAUGAUCGUUACGCUAACUAUGAGGG                                                                                           |
| crRNA-<br>HPV16_site_2   | AUUUCUACUAAGUGUAGAU <u>U</u> GAAGUAGAUUGGCAGCACAU <u>A</u>                                                                          |
| crRNA-<br>HPV18_site_2   | AUUUCUACUAAGUGUAGAU <u>ACA</u> AUUGUGCUUCUACACAGUC                                                                                  |

|                              |                                                                                                                             |
|------------------------------|-----------------------------------------------------------------------------------------------------------------------------|
| sgRNA-M13mp18                | <u>GAUCGUUACGCUAACUAUGAGUUUUAGAGCUAGAAUAGCAAGU</u><br>UAAAAUAGGCUAGUCCGUUAUCAACUUGAAAAAGUGGCACCGA<br>GUCGGUGCU              |
| T7-AasgRNA-<br>HPV16_site_1  | GGGUCUAAAGGACAGAAUUUUUCAACGGGUGUGCCAAUGGCCAC<br>UUUCCAGGUGGCAAAGCCCCGUUGAACUUCAAGCGAAGUGGCACC<br><u>UACAUUACAGGCUAACAAA</u> |
| T7-AasgRNA-<br>HPV18_site_1  | GGGUCUAAAGGACAGAAUUUUUCAACGGGUGUGCCAAUGGCCAC<br>UUUCCAGGUGGCAAAGCCCCGUUGAACUUCAAGCGAAGUGGCACG<br><u>UACAUUGCAAGAUACUAAA</u> |
| T7-AasgRNA-<br>dsActivator-1 | GGGUCUAAAGGACAGAAUUUUUCAACGGGUGUGCCAAUGGCCAC<br>UUUCCAGGUGGCAAAGCCCCGUUGAACUUCAAGCGAAGUGGCACG<br><u>ACCAGGAUGGGCACCACCC</u> |
| T7-AasgRNA-<br>dsActivator-2 | GGGUCUAAAGGACAGAAUUUUUCAACGGGUGUGCCAAUGGCCAC<br>UUUCCAGGUGGCAAAGCCCCGUUGAACUUCAAGCGAAGUGGCACG<br><u>AUCGUUACGCUAACUAUGA</u> |
| T7-AasgRNA-<br>dsActivator-3 | GGGUCUAAAGGACAGAAUUUUUCAACGGGUGUGCCAAUGGCCAC<br>UUUCCAGGUGGCAAAGCCCCGUUGAACUUCAAGCGAAGUGGCACG<br><u>AGAAGUCAUUUAAUAAGGC</u> |
| T7-AasgRNA-<br>DNMT1-1       | GGGUCUAAAGGACAGAAUUUUUCAACGGGUGUGCCAAUGGCCAC<br>UUUCCAGGUGGCAAAGCCCCGUUGAACUUCAAGCGAAGUGGCACC<br><u>CUCACUCCUGCUCGGUGAA</u> |
| T7-AasgRNA-<br>DNMT1-2       | GGGUCUAAAGGACAGAAUUUUUCAACGGGUGUGCCAAUGGCCAC<br>UUUCCAGGUGGCAAAGCCCCGUUGAACUUCAAGCGAAGUGGCACA<br><u>GGAGUGUUCAGUCUCCGUG</u> |
| T7-AasgRNA-<br>DNMT1-3       | GGGUCUAAAGGACAGAAUUUUUCAACGGGUGUGCCAAUGGCCAC<br>UUUCCAGGUGGCAAAGCCCCGUUGAACUUCAAGCGAAGUGGCACC<br><u>UGAUGGUCCAUGUCUGUUA</u> |
| T7-AasgRNA-<br>DNMT1-4       | GGGUCUAAAGGACAGAAUUUUUCAACGGGUGUGCCAAUGGCCAC<br>UUUCCAGGUGGCAAAGCCCCGUUGAACUUCAAGCGAAGUGGCACU<br><u>UUCCCUUCAGCUAAAAUA</u>  |
| T7-AasgRNA-<br>EMX1-2        | GGGUCUAAAGGACAGAAUUUUUCAACGGGUGUGCCAAUGGCCAC<br>UUUCCAGGUGGCAAAGCCCCGUUGAACUUCAAGCGAAGUGGCACU<br><u>CCUCCGGUUCUGGAACCAC</u> |
| T7-AasgRNA-<br>HERC2A        | GGGUCUAAAGGACAGAAUUUUUCAACGGGUGUGCCAAUGGCCAC<br>UUUCCAGGUGGCAAAGCCCCGUUGAACUUCAAGCGAAGUGGCACA<br><u>GCAUUAAGUGUCAAGUUCU</u> |
| T7-AasgRNA-<br>HERC2G        | GGGUCUAAAGGACAGAAUUUUUCAACGGGUGUGCCAAUGGCCAC<br>UUUCCAGGUGGCAAAGCCCCGUUGAACUUCAAGCGAAGUGGCACA<br><u>GCAUUAAGUGUCAAGUUCU</u> |
| <b>FQ ssDNA reporter</b>     |                                                                                                                             |
| poly_A                       | 5'-FAM-AAAAA-BHQ1-3'                                                                                                        |
| poly_T                       | 5'-FAM-TTTTT-BHQ1-3'                                                                                                        |
| poly_G                       | 5'-FAM-GGGGG-BHQ1-3'                                                                                                        |

|        |                       |
|--------|-----------------------|
| poly_C | 5' -FAM-CCCCC-BHQ1-3' |
|--------|-----------------------|

<sup>a</sup> Target 1 and Target 2 are re-named from mouse *Nrl* and *Prmt7* target sites used in our previous works for mammalian genome editing [1], respectively.

<sup>b</sup> HPV16 and HPV18 (site 1 and site 2) and dsActivator 1 and 2 are derived and re-named from previous work used for Cas12a-DETECTR detection [2]. HPV16 and HPV18 (site 1) are varied by 6 base pairs. HPV16 and HPV18 (site 2) are sequences within the hypervariable loop C of the L1-encoding gene.

<sup>c</sup> HERC2 SNP (>A and >G) and dsActivator 3 are derived and re-named from previous work used for Cas14-DETECTR detection [3].

<sup>d</sup> *DNMT1* and *EMX1* sites are derived from previous work used for genome editing [4].



**Table S2. The components of buffers tested for Cas12b-mediated DNA detection in this study.** Buffer 1, 3, 4, 5 were derived from previous reports, and Buffer 2, 6, 7, 8 were derived from commercial buffers. 1: Nuclease Assay Buffer [5]; 2: NEBuffer™ 3.1; 3: Cas12a Binding Buffer [2]; 4: Cas13 Nuclease Assay Buffer [6]; 5: Cas12a Cleavage Buffer [2]; 6: NEBuffer™ 2; 7: NEBuffer™ 2.1; 8: Cutsmart® Buffer.

| Buffer ID | 1x Components                                                                                |
|-----------|----------------------------------------------------------------------------------------------|
| 1         | 60 mM NaCl, 40 mM Tris-HCl, 6 mM MgCl <sub>2</sub> , pH7.5                                   |
| 2         | 100 mM NaCl, 50 mM Tris-HCl, 10 mM MgCl <sub>2</sub> , 100 µg/ml BSA, pH 7.9                 |
| 3         | 20 mM Tris-HCl, 5 mM MgCl <sub>2</sub> , 100 mM KCl, 1 mM DTT, 5% Glycerol, 50 µg/mL Heparin |
| 4         | 60 mM NaCl, 20 mM HEPES, 6 mM MgCl <sub>2</sub> , pH6.8                                      |
| 5         | 150 mM KCl, 20 mM HEPES, 10 mM MgCl <sub>2</sub> , 0.5 mM DTT, 1% Glycerol, pH7.5            |
| 6         | 50 mM NaCl, 10 mM Tris-HCl, 10 mM MgCl <sub>2</sub> , 1 mM DTT, pH7.9                        |
| 7         | 50 mM NaCl, 10 mM Tris-HCl, 10 mM MgCl <sub>2</sub> , 100 µg/ml BSA, pH 7.9                  |
| 8         | 50mM Potassium Acetate, 20mM Tris-acetate, 10mM Magnesium Acetate, 100µg/ml BSA, pH 7.9      |
| 9         | 50 mM Tris-HCl, 10 mM MgCl <sub>2</sub> , 10 mM DTT, pH 7.5                                  |
| 10        | 66 M Tris-HCl, 10 mM MgCl <sub>2</sub> , 1 mM DTT ,7.5% PEG6000, pH7.6                       |

## References

1. Teng F, Cui T, Feng G, Guo L, Xu K, Gao Q, Li T, Li J, Zhou Q, Li W: **Repurposing CRISPR-Cas12b for mammalian genome engineering.** *Cell Discov* 2018, **4**:63.
2. Chen JS, Ma E, Harrington LB, Da Costa M, Tian X, Palefsky JM, Doudna JA: **CRISPR-Cas12a target binding unleashes indiscriminate single-stranded DNase activity.** *Science* 2018, **360**:436-439.
3. Harrington LB, Burstein D, Chen JS, Paez-Espino D, Ma E, Witte IP, Cofsky JC, Kyrpides NC, Banfield JF, Doudna JA: **Programmed DNA destruction by miniature CRISPR-Cas14 enzymes.** *Science* 2018, **362**:839-842.
4. Zetsche B, Gootenberg JS, Abudayyeh OO, Slaymaker IM, Makarova KS, Essletzbichler P, Volz SE, Joung J, van der Oost J, Regev A, et al: **Cpf1 is a single RNA-guided endonuclease of a class 2 CRISPR-Cas system.** *Cell* 2015, **163**:759-771.
5. Gootenberg JS, Abudayyeh OO, Lee JW, Essletzbichler P, Dy AJ, Joung J, Verdine V, Donghia N, Daringer NM, Freije CA, et al: **Nucleic acid detection with CRISPR-Cas13a/C2c2.** *Science* 2017, **356**:438-442.
6. Gootenberg JS, Abudayyeh OO, Kellner MJ, Joung J, Collins JJ, Zhang F: **Multiplexed and portable nucleic acid detection platform with Cas13, Cas12a, and Csm6.** *Science* 2018, **360**:439-444.
